# Supplementary material for: The COVID-19 Mortality Rate Is Associated with Illiteracy, Age, and Air Pollution in Urban Neighborhoods: A Spatiotemporal Cross-Sectional Analysis
Source: Trop Med Infect Dis. 2023 Jan 26;8(2):85. doi: 10.3390/tropicalmed8020085 (PMC9962969; doi:10.3390/tropicalmed8020085)
Supplement: Supplementary file 1 [file tropicalmed-08-00085-s001.zip]

Archive with 10 entries (10 files):
- Supplementary ‎ File S1.xlsx
- Supplementary ‎ File S2.txt
- Supplementary ‎ File S3.txt
- Supplementary ‎ File S4.txt
- Supplementary ‎ File S5.svg
- Supplementary ‎ File S6.xlsx
- Supplementary ‎ File S7.txt
- Supplementary  ‎File S8.pdf
- Supplementary  ‎File S9.txt
- Supplementary ‎ File S10.txt
