# Supplementary material for: The COVID-19 Mortality Rate Is Associated with Illiteracy, Age, and Air Pollution in Urban Neighborhoods: A Spatiotemporal Cross-Sectional Analysis
Source: Trop Med Infect Dis. 2023 Jan 26;8(2):85. doi: 10.3390/tropicalmed8020085 (PMC9962969; doi:10.3390/tropicalmed8020085)
Supplement: Supplementary file 1 [file tropicalmed-08-00085-s001.zip › Supplementary ‎ File S1.xlsx]

## Sheet: Data
NeighID	Neighborhood Name	X	Y	AREA	POPULATION	V1	V2	V3	V4	V5	V6	V7	V8	V9	V10	V11	V12	V13	V14	V15	V16	V17	V18	V19	V20	V21	V22	V23	V24	V25	V26	V27	V28	Total deaths	Rate per 100,000 population
1	Kashanak	51.4794	35.8093	2.45078	38494	4.74375	1.17915	0.11771	3.38602	1.97548	0.956942	10.2217	20	1.76763	33.1908	79.0762	2.49305	56.3726	81.4915	136.251	19.8033	9.67878	11	1500	1500	2.78828	1000	15706.9	2.23942	4.93171	11.3992	36.1473	4.77997	16	44.3076
2	Darabad	51.4907	35.811	1.9384	17033	4.84579	1.16368	0.031949	1.1877	1.06431	8.51529	5.68341	20	1.07153	32.9951	78.3944	2.50159	56.89	81.3367	136.622	19.7388	10.0202	11	1500	1500	1.14963	2000	8787.16	2.68671	6.22413	10.1098	39.0319	4.18012	16	91.477
3	Hezar sang	51.3787	35.8056	0.123638	2488	4.99698	0.515243	0.126143	0.323512	0.024426	0	1.72524	15	3.46523	29.7401	74.5003	2.28258	59.2921	70.0694	128.239	20.3911	9.41684	11	5000	2500	0.109864	1500	20123.3	2.74914	4.19907	10.7717	40.5495	3.01447	1	61.2904
4	Velenjak	51.4012	35.805	2.52472	27615	3.01111	0.330713	0.735743	4.10177	1.09302	0	8.78735	15	2.06433	32.2366	77.7882	2.47128	59.5113	79.867	137.632	20.1476	9.09465	11	3000	1500	6.14879	1000	10937.8	1.18088	5.5415	14.3328	30.1775	4.5229	27	95.7706
5	Parvaz	51.3541	35.7893	1.20915	16055	11.7424	2.75666	0.010736	2.15045	1.02516	0.028214	1.56336	15	0.706585	26.4959	68.2317	2.08314	59.4983	58.8183	117.8	21.005	9.00089	11	4500	2500	1.86488	500	13277.9	1.33152	7.93233	10.0093	39.1792	2.79041	1	17.9388
6	Hesarak	51.3122	35.7831	1.74506	7112	2.14586	2.31202	0.001179	0.04563	0.015137	1.75236	0.283398	15	0.010372	29.3586	77.2331	2.01144	44.9534	48.7171	92.9784	19.2842	11.6928	11	5500	1000	0.401444	2000	4075.51	5.92377	4.65716	5.08999	46.5036	3.93701	8	101.981
7	Darya	51.3784	35.7709	2.45261	39451	10.4006	1.97728	0.140164	4.8047	2.10188	1.15084	6.05929	10	0.930952	26.2793	66.5782	2.14739	63.6698	63.507	126.658	21.3498	8.26502	16	3000	500	7.81243	3500	16085.3	2.04255	4.87365	10.1316	35.6117	3.90611	18	48.0091
8	Sepehr	51.3535	35.7686	1.88618	34411	12.1868	2.08132	0.117843	4.561	1.63949	0	3.85498	15	0.711657	26.3942	67.3793	2.06805	54.6165	51.7774	105.854	20.8174	10.0604	16	2500	1500	8.46018	3000	18243.8	1.62105	7.73383	10.5896	35.6898	3.78658	14	43.799
9	Dezashib	51.4542	35.8085	1.31492	15075	6.84831	1.07954	0.292164	7.91846	1.98183	0.035558	10.7867	15	1.05857	33.8187	79.7839	2.539	57.0305	84.1731	139.378	19.996	9.03817	11	2000	2000	2.67153	2000	11464.5	1.55355	5.56129	15.4096	27.8071	4.38474	11	73.8467
10	Hesar Buali	51.4678	35.8051	1.17838	18389	5.80769	0.90848	0.205796	6.21695	3.10133	0	10.5387	15	1.71605	33.4588	79.915	2.48804	55.8565	82.1244	136.336	19.8703	9.22706	11	2000	1500	2.36332	1000	15605.3	2.2699	5.02789	15.3298	26.4656	5.79151	8	48.5282
11	Darband	51.4269	35.8158	1.90534	11404	24.1969	1.88281	0.502019	5.81905	1.11952	3.10237	15.464	15	1.84901	33.449	79.0963	2.55794	58.7144	84.2187	140.987	20.1318	9.11689	11	1500	1500	2.05338	3500	5985.28	4.20437	7.01499	13.7233	40.93	2.71834	17	133.798
12	Qods Town	51.3751	35.7593	3.9838	28069	4.61271	0.863097	0.156381	2.85474	1.61978	0	12.7478	9	0.46221	29.1054	73.087	2.24322	58.3258	64.5651	122.034	20.7402	9.82341	16	1000	1500	5.04229	2500	7045.79	1.02178	6.56478	21.1657	22.6195	5.10171	42	142.461
13	Farahzad	51.3444	35.7895	0.839937	15882	13.3804	3.24669	0.008188	0.595119	0.652212	13.6183	1.52453	15	0.81813	27.5752	70.5995	2.089	54.1122	55.0408	108.577	20.5054	9.97882	11	4500	2000	1.30379	1000	18908.5	12.5909	4.60945	4.39491	56.0495	5.50308	22	128.582
14	West Tehran Pars	51.5321	35.7415	3.9713	126283	3.96602	1.92184	0.024307	7.02322	1.97708	0	0.448808	15	0.413759	30.7056	67.9626	2.62243	62.5755	84.9398	145.887	19.0747	12.0402	18	1500	2500	6.18635	2500	31798.9	2.99751	6.32408	8.45007	42.1219	2.41759	77	61.3874
15	Bahar	51.4332	35.7106	0.810008	21357	17.724	4.70411	1.05226	16.3686	5.7547	4.78303	0.70024	4	3.28935	38.8452	84.808	2.80017	54.3359	70.624	122.868	20.812	15.3788	19	1000	1500	4.67448	2000	26366.4	2.90632	6.33437	11.9071	37.2055	3.65688	16	75.321
16	Chizar	51.4556	35.7982	1.20872	21116	4.89975	0.881938	0.300656	11.4897	1.32935	0.84023	7.29312	15	0.653363	34.0248	80.7234	2.50781	55.6459	84.0852	137.981	19.9675	8.59268	16	2000	1000	5.64684	2000	17469.8	2.49335	4.57814	15.0028	32.625	3.9354	14	67.8197
17	Jamaran	51.459	35.8182	1.23901	9214	13.4193	0.484642	0.191205	2.3492	1.56322	2.00519	6.09369	20	1.01832	33.5525	78.9589	2.53607	57.3442	82.7562	138.336	19.9942	9.48263	11	3000	3000	2.43483	2500	7436.57	1.94416	6.49099	13.8919	31.5604	5.39397	10	100.817
18	Kuy Nasr	51.3776	35.7384	3.13498	49857	5.39532	0.462498	0.214793	3.4051	0.922401	0	3.40606	7	0.639031	33.458	84.0387	2.35806	52.1459	68.6981	119.64	20.2538	11.4155	17	1500	2000	4.81208	1500	15903.5	1.30616	6.44225	13.0092	35.3868	14.0101	43	85.765
19	satarkhan	51.3571	35.7232	1.38444	27371	12.099	2.44156	0.12064	2.62135	3.51309	0	3.27217	6	1.19271	34.3478	88.754	2.58144	54.0113	75.4942	128.51	19.431	12.434	18	1500	2000	8.87907	1500	19770.5	2.02765	6.01778	11.5633	35.6343	4.61437	66	224.418
20	Tehran Villa	51.3666	35.7226	0.671098	17257	14.1184	1.01669	0.089023	3.97248	3.10163	0	8.00754	5	1.2094	34.3295	87.6022	2.48424	53.0745	74.1387	126.132	19.8703	12.0319	18	1000	1500	7.4328	1000	25714.6	2.31704	6.0307	13.0208	30.7705	2.9843	2	21.787
21	Daryan nou	51.3608	35.7116	1.68119	49671	21.5194	4.47348	0.150443	5.48955	3.74416	0	5.78597	6	1.17013	34.8138	89.199	2.76316	59.5133	85.0574	143.77	18.9315	13.152	18	1000	1500	6.06298	1000	29545.2	2.21955	5.64699	10.485	35.8571	3.66814	12	27.3516
22	Sadeqiyeh	51.3431	35.7192	2.11235	42673	17.365	3.62976	0.135607	5.68706	2.66246	0	2.10693	8	0.700046	34.4554	90.7596	2.63699	52.744	74.4448	126.341	19.2494	12.5926	18	500	1000	6.94133	1000	20201.7	2.60935	5.6595	11.3702	34.3579	4.38919	33	77.3834
23	Tarasht	51.3432	35.7066	1.27652	25018	20.071	5.06352	0.168179	2.76816	1.17898	0.729658	5.03559	7	0.744339	36.0599	98.1305	2.86514	48.3368	70.7714	118.278	19.3379	12.67	18	1000	1000	6.06638	2500	19598.6	3.0984	4.61464	7.07091	40.7525	10.3006	27	104.608
24	Qolhak	51.4446	35.7736	1.09739	27128	7.39589	1.00215	0.160084	11.0003	3.94553	0	5.42158	15	0.993986	34.1905	83.3448	2.34582	50.1726	79.7573	128.647	20.0046	7.31728	16	1000	1500	4.99353	2000	24720.4	1.79381	4.27755	12.876	32.4876	5.09068	22	80.7855
25	Zargandeh	51.4331	35.7719	1.79073	40719	10.3308	2.40364	0.193034	11.1152	4.62295	4.11743	5.82445	15	1.19227	35.9278	83.8168	2.77606	61.3212	101.788	160.11	20.0327	6.93345	16	500	1500	5.07971	1500	22738.7	2.61789	6.07775	14.2145	36.4714	4.86014	26	64.8668
26	Davoudiyeh	51.4335	35.7628	1.423	25031	14.8003	3.44391	0.155194	12.5842	5.33125	0	3.97319	9	0.981271	34.997	82.3517	2.56453	55.5362	85.9549	139.539	20.1054	8.39306	16	500	2500	8.90874	500	17590.2	1.07323	5.24863	16.8751	28.0853	5.00579	39	147.178
27	Amaniyeh	51.4197	35.7785	2.16829	28481	9.91868	2.32751	0.400245	8.80554	3.08116	0	3.71845	15	2.44192	36.0117	83.3918	2.86198	64.1832	106.025	166.855	20.0778	6.89156	16	2000	1000	5.03549	2500	13135.2	1.14562	5.0752	18.4439	28.069	5.55458	15	55.1803
28	Kavusiyeh	51.4123	35.7621	3.74565	21686	13.89	4.89626	0.446521	11.0185	5.06648	0	0.85096	9	2.16441	34.6794	80.6893	2.63552	58.5706	84.8028	141.251	20.3372	9.46537	16	1500	500	7.15576	2000	5789.64	1.33472	6.05622	20.2066	30.1268	4.89256	21	94.4738
29	Shemiran No	51.4989	35.7594	6.33103	45744	1.72225	0.754149	0.031484	1.69852	0.333568	0.306542	0.020383	15	0.292001	31.7593	65.656	2.73991	66.2371	93.5252	158.06	17.8969	12.2304	16	3000	2000	1.67701	2000	7225.36	9.80283	3.75969	5.41055	50.6561	6.69596	28	62.2894
30	Majid abad	51.5449	35.7614	3.36964	32455	0.540942	0.01989	0.011596	1.70254	0.236436	0	1.21801	20	0.10306	31.2889	71.1097	2.58272	61.5053	83.8334	143.715	19.2971	11.5005	17	4000	4000	1.56022	3000	9631.6	3.12788	5.87324	7.70606	42.583	2.65907	10	34.9648
31	Kuhsar	51.5631	35.7557	4.53578	42098	1.85005	1.31021	0.033968	0.249567	0.168715	0	0.268636	20	0.090953	31.0577	72.0067	2.54321	59.3462	79.9274	137.647	19.7321	11.4916	17	3500	5000	1.02393	3500	9281.31	4.77681	5.86881	4.36838	48.5753	4.20685	29	69.5225
32	Golshan	51.5634	35.7425	1.56651	61689	29.6782	28.8236	0.101791	0.687483	0.458885	0	0.017404	20	0.378332	30.6586	71.6518	2.52719	58.8884	78.5473	135.836	19.8744	11.5656	17	2500	4500	3.81044	2000	39379.9	10.9981	3.76804	3.18533	55.1146	5.11112	5	11.4801
33	East Tehran Pars	51.547	35.7408	1.81331	67451	2.82663	5.46682	0.099015	2.93397	1.44537	0	0.126326	15	0.320149	30.5945	70.1466	2.55897	60.1833	80.7264	139.315	19.608	11.7452	17	1500	3500	4.18356	3000	37197.8	5.01974	5.05871	4.57666	52.3949	3.31203	37	55.8834
34	Elm o Sanat	51.5096	35.7416	2.19782	46716	4.33378	2.04973	0	5.28117	1.22345	0	0.740999	15	0.387902	30.9685	61.025	2.83016	70.0337	97.8341	166.049	17.3685	13.0869	17	1000	1000	6.67004	2500	21255.6	4.05188	4.22673	7.29514	45.1613	6.41322	31	67.0937
35	Oqaf	51.5144	35.7495	1.63673	49914	4.72947	2.62388	0	2.24996	0.865855	0.052348	0.402228	15	0.320263	31.1933	63.9504	2.76378	67.6774	94.2621	160.186	17.8575	12.6127	17	2000	2000	7.27823	3500	30496.1	5.30042	4.85105	5.84405	48.5588	2.92102	33	66.8191
36	Qanat Kusar	51.5336	35.7626	1.83489	24202	1.07206	0.347503	9.6e-05	2.19627	0.113025	0	3.08619	20	0.13994	31.4315	70.1098	2.61493	62.5284	85.9494	146.84	19.0166	11.6206	17	3000	3500	5.58604	2500	13189.9	2.47196	4.6935	10.8379	36.2179	1.99157	19	78.4574
37	Narmak	51.5046	35.7362	1.11797	29582	7.21521	1.61914	0	7.68835	2.01743	0	0.977223	15	0.48796	30.8581	59.9516	2.8518	70.7915	98.9379	167.893	17.2173	13.2586	17	500	500	6.98902	2000	26460.4	4.42746	5.23981	9.52606	43.6764	3.96525	37	120.585
38	North Janatabad	51.3085	35.772	2.33045	50898	2.65913	6.46088	0.0215	0.940704	0.142518	0	2.81756	15	0.087675	29.3678	77.6446	1.98084	42.7232	45.3973	87.4037	18.9702	12.2066	11	4000	1500	2.42256	2000	21840.4	3.27437	5.10027	6.1417	45.1127	3.75457	42	82.2613
39	Moradabad	51.3265	35.7848	1.45014	4639	2.02303	1.77772	0.020473	0.440495	0.437835	0	2.35878	15	0.195185	28.5593	73.63	2.05442	46.3794	48.1622	93.8212	19.8552	11.5547	11	5500	1000	0.131868	3000	3199	3.5	6.36005	8.60099	40.0654	4.76396	3	70.0688
40	North Punak	51.3286	35.7658	1.48167	29295	8.06466	2.68521	0.201907	3.67971	1.53517	0	4.25971	15	0.199397	27.3425	68.4258	2.00969	37.6591	32.3455	69.0545	19.933	13.6187	11	3500	1000	4.99091	3500	19771.7	2.31649	5.26051	7.26063	41.6886	7.27428	17	59.9637
41	Marzdaran	51.3407	35.7389	3.62398	54355	7.42641	1.46007	0.073866	2.63405	1.61329	0	2.02988	9	0.441236	31.3053	80.6767	2.29067	48.4322	59.1666	106.738	19.5264	12.3478	16	1000	1000	5.73734	2000	14998.7	2.00785	5.02615	8.58247	41.6312	4.31607	47	86.0125
42	Punak	51.339	35.7629	1.96064	26804	6.48285	2.76303	0.178159	3.06603	1.0339	0	5.67372	15	0.310407	27.6784	69.6553	2.04423	41.3261	38.2708	78.7286	20.0119	12.8742	16	3000	500	3.5676	3500	13671.1	2.03366	6.13389	7.76377	42.2625	7.21534	17	64.9544
43	Eivanak	51.355	35.7566	3.02516	24650	4.66716	1.48245	0.106382	1.91368	1.0072	0	13.8069	10	0.347017	28.8667	73.2828	2.16108	50.4586	53.6378	103.244	20.2132	11.3849	16	1500	2000	5.72858	3500	8148.34	1.43449	8.37672	17.0183	21.0448	4.68966	16	66.3913
44	Saadatabad	51.3783	35.7834	3.96341	62071	7.61064	2.86576	0.200993	7.26278	1.63182	0	8.38543	15	0.953375	26.0416	66.1153	2.13998	64.3278	64.0905	127.89	21.333	8.00748	11	3500	1500	5.64034	2500	15661	1.43472	5.26094	12.0572	32.4318	5.73859	104	163.26
45	Qasemabad - Deh Narmak	51.5233	35.767	4.1069	21716	0.666787	0.482566	0	0.436083	0.077577	0	2.61134	15	0.078856	31.6879	69.9782	2.62862	62.7164	87.016	148.092	18.8672	11.5805	17	4000	3000	1.02529	1500	5287.69	5.36019	5.01657	5.48444	49.7322	2.7261	10	50.0799
46	Shahrak Azmayesh	51.3589	35.7389	4.9494	41826	3.22862	1.16316	0.130644	1.9119	1.30156	0	3.37609	8	0.751015	32.4566	82.877	2.37088	52.211	66.8061	117.949	19.768	11.9133	18	1000	2500	3.92513	1500	8450.72	1.9895	6.44788	11.2848	37.3404	4.82236	5	16.5528
47	Central Janatabad	51.3039	35.7589	1.80046	41016	5.66649	7.75663	0.069331	3.98561	1.13943	0	3.48153	15	0.186723	30.2355	82.4813	1.91816	42.1154	46.8004	88.2789	18.072	12.2005	11	2500	3000	4.72187	2500	22780.8	2.81029	4.84765	7.24839	42.3735	4.4056	17	44.0416
48	South Janatabad	51.3061	35.7457	2.71223	71751	6.36716	6.02019	0.093421	5.07531	1.56306	0	0.505251	15	0.337499	31.1733	86.4968	1.92633	43.1601	51.2479	93.8286	17.6301	12.0399	16	1500	2500	8.24146	3000	26454.6	2.28943	5.38605	7.18318	37.7358	4.3651	22	32.6413
49	Naft	51.3378	35.7914	1.60092	15796	4.94585	2.4517	0.014829	0.572593	0.591134	0.008038	1.44878	15	0.545039	28.2852	72.5516	2.08764	50.9562	53.2603	103.56	20.1974	10.6081	11	5000	1500	0.097645	1500	9866.82	2.25981	7.53998	6.21043	54.9114	4.86832	9	60.4632
50	South Shahran	51.2909	35.7585	0.949367	26110	11.7585	9.73154	0.085687	6.1026	0.957545	0	2.76775	15	0.308207	31.7315	93.0245	1.70842	41.1604	48.9796	89.7106	16.043	11.7988	11	3500	3500	4.36338	1500	27502.5	2.5116	4.81149	6.99732	44.8725	6.1126	18	69.9167
51	Shahr ara	51.3743	35.7181	1.68927	37611	15.729	2.14573	0.189195	5.4604	4.67865	0	11.1209	5	1.09407	34.3389	87.8335	2.34759	50.3872	70.5832	119.872	20.2296	11.5408	18	1000	1000	5.26227	1000	22264.7	2.0344	5.49671	11.6774	33.7376	5.969	20	55.0871
52	Abbas abad	51.4347	35.7276	1.42382	19277	16.3112	4.41287	0.304283	20.0252	5.87233	0.881388	0.436599	6	1.67209	42.7424	84.4602	2.94669	44.9513	51.2244	95.0588	21.7425	17.2234	18	500	2000	8.41748	500	13538.9	1.71005	4.6059	12.6472	36.4739	5.72185	28	135.878
53	Heshmatiyeh	51.4501	35.7261	0.979507	15046	13.9195	1.38228	0.269564	8.06273	1.92219	10.8527	1.42213	7	1.04311	38.3007	81.3146	2.78113	51.6335	65.1294	115.314	20.8352	14.7823	18	1000	1500	5.79147	1000	15360.8	3.2128	4.92723	9.86309	42.461	6.47348	12	79.4676
54	Kaj	51.4421	35.7139	1.03192	17982	10.5385	2.51192	0.685002	11.8256	3.81206	4.98012	1.10706	6	1.41162	38.4364	83.3007	2.78771	52.9991	68.0551	119.244	20.8504	15.1734	19	1500	1500	4.99778	1500	17425.8	3.01569	5.32617	9.72639	45.1604	4.34323	6	39.9888
55	Haft Huz	51.4899	35.7283	1.11269	32725	11.6966	1.30416	0	10.9814	2.04087	0.110576	2.49848	10	0.871623	30.6431	62.4004	2.77068	68.0555	93.7046	160.048	17.9696	13.007	18	1000	500	8.61601	1500	29410.7	2.71967	5.07102	10.0504	38.8062	2.36516	13	43.0695
56	Madaen	51.4971	35.7275	1.13551	36579	10.4513	1.60439	0	10.004	2.60996	0.04071	3.1696	10	0.758499	30.3229	62.522	2.74343	67.426	92.3846	158.14	18.1604	12.8839	18	1000	500	7.84013	2000	32213.8	2.81211	5.12795	10.3529	38.6403	3.02086	20	56.5189
57	Narmak	51.4909	35.7177	0.849636	30311	21.3327	2.88932	3.3e-05	8.60305	2.07762	18.117	6.28126	10	1.16104	28.633	67.3477	2.4889	60.2119	77.7275	136.676	20.3051	11.9792	18	2000	500	9.13529	1000	35675.3	3.31204	5.54472	8.84497	44.0473	3.0583	37	117.956
58	Qasem abad	51.4729	35.7073	0.680417	23373	26.0069	4.82309	0.053776	4.45527	1.68458	0	0.441449	8	0.851991	28.8357	72.0594	2.40152	56.6993	71.0921	126.511	21.2066	11.9219	18	1500	500	5.79853	1500	34351	3.30371	4.24456	8.65529	38.5798	4.74907	9	43.1746
59	Sabalan	51.4634	35.7245	0.5564	26599	16.154	3.26869	0.119319	4.24413	1.29821	51.2387	0.729931	7	0.77838	34.152	75.9457	2.66598	57.3025	75.923	131.639	20.0489	13.1644	18	1000	500	5.50666	2000	47805.6	7.34414	4.78039	7.80856	51.4591	8.14316	11	45.2173
60	Shahed	51.463	35.7116	1.30298	41940	22.0216	4.97602	0.188788	5.18667	1.64366	47.096	0.771327	7	0.855039	32.4494	76.1464	2.56289	56.8486	73.8644	129.078	20.6175	12.9587	18	1000	1000	6.68788	2000	32187.8	6.26158	4.4075	8.50978	45.0531	3.69337	13	34.2627
61	Vahidiyeh	51.4709	35.7144	0.689634	34841	25.0399	4.87209	0.069866	5.09619	1.93844	56.7503	0.380339	7	0.928102	30.8555	72.9108	2.51583	57.6134	74.4023	130.57	20.6139	12.4606	18	1000	1000	5.87842	1500	50521	5.81366	5.2972	7.23573	47.7842	5.55093	52	143.39
62	Taslihat	51.4732	35.7193	0.524568	22412	16.6507	4.03793	0.047739	4.10588	1.6957	15.9093	0.474632	8	0.996288	31.3499	71.7768	2.57525	59.0866	77.7891	135.368	20.1123	12.5984	18	1000	1000	6.70576	1500	42724.7	5.54076	4.7339	7.77262	47.4152	5.43905	8	40.8835
63	Fadak	51.4813	35.7277	1.43972	39878	10.4492	1.85189	0.005291	5.67457	1.31606	0	1.09154	9	0.940044	31.1715	65.524	2.72303	65.4868	89.432	153.247	18.5099	12.8459	18	1000	1500	9.61788	1500	27698.4	4.20818	5.22106	10.0005	41.6708	4.27053	19	49.8578
64	Nilufar	51.4341	35.736	2.59371	29545	16.2761	4.26938	0.270757	14.3185	4.05558	0	0.640293	7	1.56042	40.545	83.4176	2.84511	48.0027	58.5879	105.32	21.2877	15.6063	18	1000	1000	7.95651	500	11391	1.80001	4.92173	15.2716	33.9745	5.41547	7	28.8967
65	Kazem abad	51.4691	35.7501	1.34713	30238	6.80903	1.71925	0.130818	3.95906	0.426158	1.70603	0.263595	10	0.74192	33.2197	73.4661	2.59879	58.719	83.4659	140.76	18.9842	11.2963	17	1000	1500	5.74041	2000	22446.2	4.57611	5.07267	9.05152	46.7973	4.69277	8	31.2937
66	Kerman	51.4739	35.7326	1.47304	52778	10.1152	2.33523	0.013928	4.33536	1.02524	13.5925	0.179768	9	0.907711	32.2856	67.9538	2.73488	64.1655	88.119	150.602	18.5714	12.8193	18	1000	1000	6.67656	1000	35829.3	5.3726	5.52313	7.84039	48.6481	5.25787	29	56.2408
67	Lashqar	51.4657	35.7276	0.423994	17207	13.97	2.9371	0.079915	3.48279	1.16165	26.7447	0.333157	7	0.857728	33.6875	74.3815	2.66759	58.606	78.2868	135.31	19.7572	12.9072	18	1000	1000	6.91599	2000	40583.1	8.33386	5.50635	7.65967	50.953	4.85849	5	36.5949
68	Nezam abad	51.4531	35.706	0.583186	14583	25.4061	5.71473	0.492597	6.99679	2.70703	59.4181	0.501961	6	1.22235	34.2191	80.3699	2.62805	57.3175	75.8147	131.101	20.4922	13.6068	19	500	500	6.04958	2500	25005.7	7.0386	4.41189	8.03675	46.9449	5.72584	34	205.776
69	Shahid Asadi	51.4554	35.7014	0.532424	25511	29.2239	7.2943	0.419288	5.10869	2.34894	38.3067	0.050199	6	1.11136	32.6912	79.3026	2.55497	58.05	76.3731	132.357	20.5434	13.1127	19	1000	500	8.19655	3000	47914.8	6.45718	4.61719	7.33017	45.9069	8.13767	12	50.4272
70	Kohak	51.4885	35.7424	0.935088	24848	2.79434	1.20558	0.001042	6.69457	0.752857	0	0.212427	10	0.486695	31.094	56.4679	2.96433	74.6249	105.796	178.462	16.2898	13.7955	17	1000	500	7.77783	1000	26572.9	3.9675	4.4355	8.54797	41.4081	5.76304	24	94.5194
71	Shamsabad - Majideiyeh	51.4782	35.7473	2.4945	67631	3.43689	1.43511	0.052686	4.24946	0.316621	0.044357	0.391026	10	0.691	32.1114	65.5382	2.77196	66.3496	93.7527	158.402	17.793	12.5398	17	2000	1000	5.96415	1500	27112	3.55344	4.342	8.1161	45.596	3.49248	46	68.4608
72	Qaba	51.4493	35.7609	1.01947	17008	13.3933	0.934455	0.165444	12.5851	6.0386	0	4.30545	9	1.02291	33.7793	82.3031	2.25788	47.6198	72.296	119.133	19.9779	8.24445	16	1000	2500	7.60656	1500	16683.2	2.15801	4.5739	13.2173	32.244	4.59196	12	71.7237
73	Khajeh Nezam Almolk	51.448	35.7132	0.844991	33769	12.8599	2.93686	0.548844	9.43418	2.74028	55.1127	1.27736	6	1.12207	36.9451	81.9573	2.73646	54.5163	71.1033	123.772	20.6552	14.5517	19	1000	1000	4.39037	1500	39963.7	4.1016	5.35623	8.37158	48.1361	4.63147	10	33.7196
74	Khajeh Nasir	51.438	35.7038	0.573228	16771	28.7878	6.93279	1.19053	13.793	5.07104	19.4858	0.531428	4	2.64167	36.7167	84.8396	2.72903	59.3839	80.2684	137.004	20.3876	14.5778	19	1000	500	10.4499	2000	29257.1	2.81947	6.66036	8.88438	44.0995	6.89285	10	62.5262
75	Aramaneh	51.4571	35.7208	0.856819	31087	13.1143	2.8463	0.234404	5.89721	1.39051	46.156	1.41784	7	0.773048	35.7231	78.9734	2.70328	55.0185	71.9619	125.367	20.4348	13.8754	18	1000	1000	5.01825	1500	36281.9	6.20086	3.98118	9.25789	46.7074	3.54489	3	15.9028
76	Gorgan	51.4509	35.7096	0.597085	22352	20.135	4.37337	0.535004	8.26122	2.70127	38.595	0.9552	6	1.20297	35.5002	81.1833	2.68374	56.2861	74.3665	128.685	20.5061	14.0288	19	500	1000	4.28274	2000	37435.2	5.06055	4.72658	8.29456	49.2	3.91911	23	99.8542
77	Dardasht	51.5067	35.7287	1.31954	30527	8.98867	2.05755	0	5.8318	2.44885	0	1.67269	15	0.685559	30.2347	63.5753	2.70674	66.1187	90.1422	154.617	18.4351	12.6701	18	1000	500	6.02319	1500	23134.5	3.42905	5.80533	9.31307	42.3492	2.48305	16	54.797
78	Almahdi	51.3284	35.7739	1.40361	43346	5.08787	2.71329	0.142416	1.93818	1.40957	0	4.66577	15	0.28087	27.8425	70.6425	2.02911	41.4596	39.1299	79.7445	19.9039	12.7361	11	4500	1000	2.40538	3500	30881.8	2.71118	5.36621	5.66604	47.5245	6.84723	13	33.2261
79	North Shahran	51.2867	35.7734	4.05871	32862	2.51264	5.46824	0.006588	2.61358	0.203352	0	0.508457	20	0.26863	31.1529	87.7473	1.81892	42.9624	50.4533	92.9069	17.277	11.557	11	5000	3000	0.419457	1500	8096.66	2.09414	6.07466	8.81261	43.5613	4.90232	26	79.0287
80	Dulab	51.4609	35.6659	0.638902	25424	16.737	5.43225	0.248253	1.94234	1.55617	38.4325	0.135573	7	0.28137	24.4388	89.9437	2.08501	43.9798	59.4469	102.295	17.6132	8.84737	19	500	500	5.96338	1000	39793.3	6.98237	4.05919	6.73773	44.323	3.45343	10	43.5756
81	Minabi	51.4567	35.6518	0.779047	27379	19.6423	7.23195	0.201316	0.487323	1.30007	58.866	0.637275	8	0.320021	26.0288	87.548	2.17328	46.4813	62.2472	107.599	18.2917	9.75642	19	1500	500	3.87906	2000	35144.2	14.3785	3.42527	7.83447	49.8307	3.98481	16	60.4519
82	Emamat	51.4897	35.71	0.696357	28901	17.1714	3.33462	0	8.39119	2.13253	0.286887	4.71636	9	0.972874	25.6373	66.6785	2.26982	56.3374	67.4341	122.995	21.9469	11.1169	18	2000	500	12.353	500	41503.1	2.69004	5.1306	8.6087	38.6654	4.46005	6	26.3554
83	Hafeziyeh	51.4955	35.7011	0.991162	32655	4.38721	5.12753	0	5.13828	1.19565	0	0.708979	9	0.339243	22.0845	63.3645	2.05973	53.6332	58.4905	111.933	23.5174	10.2394	18	500	1000	11.583	1000	32946.2	3.02803	5.13861	7.87322	37.661	2.18037	4	18.0007
84	Zarkesh	51.4804	35.716	0.708458	23781	25.8938	4.04836	0.010129	6.13605	2.08373	24.1838	3.15248	8	1.25606	29.2877	69.5617	2.48246	58.9156	75.7966	133.407	20.5279	12.0776	18	1500	500	8.27844	500	33567.2	5.41008	5.43626	10.3192	44.8779	3.74669	4	23.9374
85	Bimeh	51.3186	35.7053	0.706314	22433	13.4283	13.1042	0.0172	6.05269	0.965197	0	6.28706	9	0.081783	33.4781	89.3451	2.48541	51.7126	77.6206	128.701	19.3377	12.0697	18	1000	1500	1.7326	3000	31760.7	1.89508	5.04693	5.29577	43.2232	10.7565	7	36.9374
86	Ekbatan	51.3042	35.708	4.55898	47251	4.45271	4.59362	0.017329	3.57126	0.572984	0	5.68135	15	0.004756	32.9241	88.3702	2.28422	49.2214	71.2009	119.99	18.9633	11.4902	18	500	3000	2.42508	2000	10364.4	1.30133	7.58982	14.3108	30.9756	5.26973	24	52.4859
87	Forudqah	51.3146	35.6884	10.7843	5534	4.83665	14.4379	0.027507	0.821383	0.317005	0	1.6541	15	0.261985	33.0782	88.3979	2.47002	49.0723	81.3144	130.289	20.2017	11.2973	18	1500	2500	0	4000	513.15	0.98671	5.13496	0.343332	10.7226	21.919	1	39.7325
88	Saei	51.4163	35.74	2.59966	8815	18.8008	10.3059	0.592001	12.7585	7.07827	0	0.305608	7	1.53894	37.8702	82.764	2.70191	51.5757	66.6309	116.712	20.8836	13.5963	18	1500	500	8.75164	1000	3390.82	2.34067	4.67416	19.1151	32.0628	8.32672	6	70.6879
89	Emamzadeh Abdolah	51.3493	35.6789	1.25069	19903	21.8186	9.98889	0.345131	2.9794	1.06924	13.9607	6.72455	6	1.58624	33.2447	93.2935	2.37757	52.6541	92.8707	145.367	19.9693	12.2244	19	2500	500	5.71099	1500	15913.6	7.66067	4.52216	7.59182	50.3229	6.9487	2	19.2837
90	Sharif	51.3531	35.7056	1.17122	17725	25.0744	7.56655	0.243445	4.82797	1.78567	2.26325	4.24719	6	1.04554	36.2583	97.9869	2.93835	50.6197	73.3324	123.158	19.1247	12.9063	18	500	1000	8.73858	2000	15133.7	2.89846	4.9744	8.50212	39.149	8.17489	7	45.2776
91	Shahid Dastqeyb	51.348	35.6867	0.599552	23846	15.9665	7.76556	0.367052	1.94762	1.29253	60.7756	0.625908	6	1.03168	33.6216	90.8316	2.55609	58.9282	96.2861	154.94	19.2717	12.8547	18	2000	1500	6.12879	1000	39773	8.43843	4.89406	7.05779	51.2441	9.48587	7	35.0024
92	Ostad Moein	51.3417	35.696	1.04097	18492	22.5742	6.97953	0.229276	3.06069	1.34777	7.45749	2.1778	7	0.534336	35.0705	94.4741	2.76312	54.0656	82.8026	136.315	19.1858	12.8608	18	1000	500	6.63276	1500	17764.1	5.81335	6.62346	8.67943	41.0029	6.23513	33	163.941
93	South Mehrabad	51.3381	35.6771	0.856872	31162	17.9131	6.58565	0.123659	3.51232	1.64398	27.7979	10.5703	8	1.44422	32.2696	100.052	2.08021	44.6991	93.1	137.785	20.8102	11.214	18	1500	1000	6.02233	1500	36367.2	4.82239	5.63889	5.61581	40.5405	7.96483	18	59.6151
94	Emam Khomeini	51.3753	35.6859	0.824982	39246	77.9269	6.7708	0.591748	9.24654	4.25396	58.0373	12.568	4	2.09387	34.5947	79.6302	2.80056	64.2029	90.8475	154.021	18.9697	13.4105	19	500	500	9.93156	1000	47572	4.65305	6.29226	7.18035	48.2275	7.19309	34	86.0022
95	Mortazavi	51.3675	35.6852	0.576189	28661	86.7876	8.00921	0.631167	7.32687	4.59611	74.7996	6.76221	5	2.47566	34.1646	81.4229	2.78885	67.4227	97.9153	164.688	18.6654	13.6798	19	1500	1500	7.58412	1500	49742.3	4.70395	5.15415	7.26074	47.8386	5.20917	49	161.83
96	Haft Chenar	51.3702	35.676	0.945426	44808	40.9446	6.2341	0.514778	3.63548	2.18928	65.8428	6.98494	5	1.41572	34.4833	78.4905	2.77355	60.0245	85.6113	144.853	19.2716	13.0862	19	1500	1000	6.33641	1000	47394.5	6.0787	4.36496	7.62364	44.8632	5.07275	13	32.2127
97	Hashemi	51.3595	35.6846	0.876168	38009	47.6022	7.94913	0.576073	4.54911	3.01109	78.6822	0.943433	5	2.05912	33.8733	84.0602	2.73762	67.162	100.758	167.504	18.6561	13.6184	19	2000	2000	7.37121	1000	43380.9	7.12409	5.72762	7.56663	48.9182	7.72185	55	139.64
98	Rah ahan	51.4004	35.6606	0.365539	13729	44.3742	3.62429	0.242959	1.72166	2.73085	59.1308	0.209819	5	1.708	35.1739	73.4972	2.87312	60.0592	84.4086	142.753	19.9037	15.3301	19	500	500	6.2764	1000	37558.2	6.96443	4.60297	6.74485	49.239	7.33484	26	168.738
99	Foruzesh	51.4036	35.6711	0.567702	24795	62.9277	5.12208	0.27338	3.66505	3.56863	81.6985	0.61952	4	1.77629	36.944	81.5665	2.90917	69.4236	96.6013	162.266	19.6208	14.6836	19	1000	500	5.74827	1000	43676.1	4.71739	4.46523	7.42488	43.5348	4.1218	30	116.188
100	Qalamestan	51.3977	35.6716	0.399298	13119	103.703	6.27255	0.295174	4.57056	3.44077	65.6086	0.713207	4	1.84849	35.1557	69.6865	2.94333	60.0525	77.8894	135.962	19.3061	12.6882	19	1000	500	6.24934	1500	32855.2	4.11385	5.76524	7.16518	44.5002	5.35864	11	82.7383
101	Amiriyeh	51.4009	35.6782	0.831798	30865	60.6666	6.47295	0.441664	7.73728	3.73915	61.2807	1.0727	3	1.46997	37.5016	83.6245	2.92763	72.113	100.518	168.296	19.5688	14.7034	19	500	500	8.6728	2000	37106.3	3.9819	3.75182	7.69156	40.94	3.63518	51	157.221
102	Makhsus	51.3897	35.6781	0.614053	19352	62.61	6.49527	0.403893	4.13338	2.88078	32.7503	6.01691	3	1.09274	34.5775	66.2523	2.9506	57.3015	72.1235	127.998	19.16	11.9	19	1000	1000	7.18128	1500	31515.2	4.05141	4.10994	6.47995	45.8646	6.60397	23	113.181
103	Salsabil	51.3738	35.6958	1.01034	35749	82.7257	10.3177	0.537614	18.9866	8.42145	52.8051	14.5948	4	2.543	34.3145	82.0498	2.78533	69.1248	98.7478	167.075	18.5835	13.8063	19	500	500	10.9424	2000	35383.2	3.82414	5.77461	8.27716	43.6806	6.39738	44	119.462
104	Jomhuri	51.3821	35.6973	0.463885	12824	59.239	7.79239	0.669306	19.3191	6.22471	15.1902	17.7705	3	2.57042	34.9075	84.0237	2.68519	62.3205	88.3894	149.39	19.3026	13.335	19	500	500	12.9614	2000	27644.8	3.12016	4.6696	9.87212	46.3966	5.98097	18	128.156
105	Aqahi	51.4014	35.6649	0.4614	17340	74.9583	3.94588	0.241961	1.65309	3.14225	86.1296	0.265788	4	1.87974	35.5813	75.0714	2.88826	62.3883	85.7201	145.845	19.6668	14.3686	19	500	500	6.49787	500	37581.3	6.00224	4.46409	7.29527	45.9967	6.07843	20	109.649
106	Dabestan	51.4545	35.7358	1.91873	22371	12.2768	2.12918	0.193557	7.62893	2.09936	0.37038	0.860823	8	1.28461	36.3336	78.7688	2.70973	54.3978	72.142	125.063	20.2196	13.3689	18	500	1000	4.92224	1500	11659.3	2.62693	3.98393	10.1828	45.9151	5.56971	3	21.3391
107	South Punak	51.3254	35.7569	1.65913	35293	8.32611	2.94843	0.147376	4.1697	1.08954	0	3.77721	15	0.151057	27.805	70.0943	2.02391	38.6491	35.0955	72.8274	19.7854	13.4302	16	2500	1000	6.6741	4000	21272	2.17791	5.72201	6.55087	43.6998	7.36407	14	42.7935
108	Shahain	51.3149	35.7616	1.15496	26444	4.05697	2.93718	0.079885	2.50792	0.775258	0	5.13954	15	0.17117	28.6817	74.0861	2.01253	40.8086	40.6732	80.6657	19.3517	12.8433	11	3000	2000	5.03125	3000	22896	2.69963	5.73797	6.39464	46.3237	5.65724	17	65.7452
109	Shahr ziba	51.292	35.7484	0.613575	7602	6.95665	7.25383	0.126098	3.80335	1.39814	0	2.80773	15	0.169689	32.3652	85	1.61946	40.1926	49.0658	88.9119	15.0201	11.839	16	2500	4000	4.5934	2000	12389.7	3.07542	5.38786	8.65562	37.8981	4.99869	13	143.93
110	Sazman Ab	51.29	35.7394	1.32052	30682	3.32048	1.9745	0.090627	2.25749	0.803414	0	6.05952	15	0.066806	32.9984	85	1.52622	39.6159	49.5089	88.8051	14.0878	11.918	16	2500	4000	3.27335	2000	23234.7	2.02724	4.85987	8.40884	32.8593	2.70517	2	13.1355
111	Parvaz	51.3064	35.7247	0.940039	26215	5.10156	5.36341	0.092105	2.89221	1.23916	0	2.64318	10	0.317963	32.6484	89.7527	2.10221	47.2236	63.1471	109.744	18.0563	11.8144	18	1000	3000	6.41757	2500	27887.1	2.10496	6.17856	6.41999	38.7869	3.92905	16	62.8501
112	Eram	51.2871	35.7287	2.71349	24471	2.65283	0.509966	0.023047	0.530472	0.264911	0	5.68571	15	0.011592	33.2264	85	1.56379	40.4111	52.1621	92.254	14.344	11.7661	18	1500	4500	2.87138	1500	9018.26	1.76817	6.52802	5.95399	48.2371	4.35209	9	41.4568
113	Abazar	51.3307	35.7307	1.25276	30063	12.9124	2.37276	0.114029	4.49926	2.64717	0	0.747103	9	0.38342	32.453	85.2115	2.33963	49.8256	65.1119	114.118	19.1842	12.3324	17	1000	500	5.5971	1000	23997.3	2.18663	5.70569	7.461	37.5874	4.72009	15	52.5501
114	South Sazman Barnameh	51.3001	35.7263	1.0301	28687	6.4609	2.84613	0.064041	1.98303	0.77462	0	4.02531	15	0.202507	32.6516	92.3846	1.94372	45.3047	59.6925	104.454	17.2191	11.6938	18	1000	3500	4.86892	2000	27848.8	1.91823	5.40395	5.316	44.8798	4.7722	11	42.2495
115	North Sazman Barnameh	51.3011	35.7365	1.01526	29108	7.91184	3.66547	0.098426	3.32605	0.946877	0	3.8099	15	0.3843	32.2977	92.7479	1.8532	43.78	55.139	98.374	16.7078	11.9212	16	1500	3000	6.64805	3000	28670.5	1.87419	4.2769	7.8329	32.8927	2.65906	10	38.5954
116	Baq Feyz	51.3226	35.7445	2.57434	64218	3.80436	3.58323	0.05802	2.02547	1.34655	0.380136	1.62517	15	0.292943	30.0686	78.5437	2.09926	43.8886	49.4643	92.6045	19.1506	12.4434	16	1500	1000	3.15672	3000	24945.4	2.30379	4.90892	6.64144	45.2423	4.9005	27	43.7171
117	Hosseinabad Dulab	51.4715	35.664	1.68932	23990	7.31992	3.5927	0.149482	0.876465	0.831958	3.00132	1.74879	8	0.205212	23.9065	89.8003	2.05282	43.0319	57.8026	99.7988	17.5845	8.55856	19	1000	1000	6.82355	1500	14201	6.336	4.64315	6.35682	41.089	3.60984	39	152.828
118	Motahari	51.4427	35.6484	1.13869	17377	32.0688	8.52571	0.342555	0.576421	0.530054	1.52257	0.094177	8	0.337367	30.3041	83.9326	2.42165	53.1548	72.8139	124.659	19.4752	12.3754	19	500	500	5.40551	1500	15260.5	12.0751	2.4212	7.59049	47.6104	2.91189	30	158.225
119	Takhti	51.4104	35.6628	0.857951	24646	40.5559	3.11953	0.254116	0.598511	2.91194	64.9517	0.077711	5	1.27526	36.1735	81.4154	2.83953	66.3544	94.6937	157.994	19.9444	15.7185	19	1000	1000	6.14748	500	28726.6	9.4019	3.38631	5.95634	47.0289	3.93979	25	98.8076
120	Bazar	51.4227	35.6726	1.10882	10000	155.325	9.05182	0.371721	14.8509	3.26388	57.4269	0.097343	4	3.7292	39.0103	97.051	2.85587	81.7992	119.579	195.02	19.9282	16.7104	19	1000	500	2.25702	1000	9018.58	19.3277	0.051553	6.5	48.5294	0.62	32	262.387
121	Mazaheri	51.4376	35.6545	0.608033	14451	50.7193	7.31264	0.470396	2.09	0.803638	53.6086	0.005394	7	0.487992	31.6386	84.432	2.50277	56.4643	78.4826	133.164	19.5646	13.1279	19	1000	1500	5.21296	1500	23766.8	20.06	3.3032	8.5738	45.7312	3.28697	19	121.982
122	Chaharsad Dastqah	51.4571	35.6873	0.564175	20339	31.9527	9.02884	0.393713	5.57615	2.23421	42.0368	0.073277	6	0.459371	30.4751	81.8335	2.4436	56.8209	74.979	129.659	20.0941	12.3652	19	500	500	6.17068	2000	36050.8	3.5866	4.40473	7.47824	41.9281	3.47116	12	61.542
123	javadieh	51.4654	35.6855	0.500743	24518	28.1901	7.44515	0.221374	3.40728	1.47315	62.9501	0.565765	7	0.310753	28.3511	79.6029	2.33764	54.0947	69.5138	121.984	20.2636	11.5033	19	1000	1000	6.15773	1500	48963.3	4.96276	4.45899	7.58218	46.2173	4.27849	22	88.4128
124	sar aiab doolab	51.4607	35.6794	0.289299	11839	24.4781	7.11648	0.318652	2.23355	2.11447	60.3943	0.538395	6	0.212956	28.2227	83.6933	2.31814	52.6575	69.5898	120.447	19.411	11.1574	19	1500	500	4.91777	1000	40923.1	6.05311	4.14766	7.30636	44.7033	3.85168	6	56.4039
125	Shahed	51.4771	35.6731	0.776343	18215	9.55587	3.11273	0.147827	0.23107	0.523853	0	9.71079	8	0.227279	25.611	83.2039	2.16454	48.1998	62.0589	109.157	19.1941	9.85376	19	1000	1500	8.22328	1500	23462.6	4.50012	4.01551	6.50014	41.4518	4.25474	10	58.2955
126	Harandi	51.4247	35.6641	1.73462	24766	70.5946	5.9431	0.333875	2.82322	2.98746	45.5217	0	5	1.40065	35.7503	87.2086	2.73864	67.9365	97.1842	161.529	19.886	15.2693	19	1000	1000	4.62701	1000	14277.5	20.0395	2.96022	5.82654	68.2692	8.26536	44	166.502
127	Shush	51.4403	35.6581	0.455239	14452	55.5489	7.15667	0.452986	3.18867	1.35675	78.948	0.007741	6	0.475132	31.0074	85.8583	2.45726	55.9312	77.4926	131.513	19.3691	12.6284	19	1000	1000	5.16844	1500	31746	13.8096	3.34877	7.72903	51.2945	2.26958	59	349.533
128	Nourth Afsarieh	51.4943	35.6554	1.44762	60098	17.9919	3.51136	0.069144	3.27985	1.51658	0	4.29822	15	0.187068	26.2718	79.41	2.16319	47.4591	55.9188	102.411	20.5662	9.76309	19	1500	1000	5.73884	3500	41515.1	6.42222	4.51145	7.38793	45.0664	2.79543	26	44.9842
129	Valiasr - Bisim	51.4501	35.6536	0.587496	18156	29.8156	7.12341	0.301356	1.15544	1.29247	55.5999	0.326982	7	0.388579	27.6959	86.6676	2.26994	49.4675	66.8691	115.015	18.693	10.7226	19	1000	1000	2.46879	1500	30904	15.2539	3.4434	8.12954	46.0051	6.11368	28	143.036
130	Jalili	51.3621	35.6505	0.366103	20749	43.9909	25.6331	0.472722	4.35628	3.36507	53.4033	1.05998	7	0.826122	35.2197	81.1147	2.60695	54.1861	79.434	135.566	20.0027	13.6669	19	1000	2000	7.42452	1000	56675.3	11.8114	3.81301	6.73285	45.1882	3.1616	10	52.1082
131	Zehtabi	51.3603	35.6418	0.755887	19295	49.0098	26.7548	0.277097	0.454699	1.67267	33.7447	1.17228	8	1.09434	36.201	82.7868	2.48403	51.9883	73.9099	130.842	20.0947	13.3114	19	500	3000	8.2021	1000	25526.3	12.1011	3.50249	5.16196	50.3146	4.61259	9	51.0273
132	Sarasiab Mehrabad	51.3296	35.6718	0.946827	29302	29.0255	6.18015	0.060583	2.66271	1.78751	12.1544	10.0395	9	0.905157	32.6869	94.8645	2.24897	47.054	89.1957	136.309	20.5968	11.3629	19	2000	1500	7.14689	2000	30947.6	4.76654	5.71114	4.73346	39.5023	10.4396	17	59.9508
133	South Khaniabad	51.3947	35.6189	0.823745	18186	4.80872	2.74388	0.040667	1.37329	0.669644	0	2.91363	10	0.459147	35.6677	79.1931	2.51955	52.0052	72.9953	129.497	20.2801	14.4876	22	2500	3000	5.31397	2500	22077.2	7.68438	4.10623	5.94413	44.4602	3.09579	4	30.2216
134	North Dolatkhah	51.3439	35.6146	1.29452	13691	2.01886	1.99967	0	0	0.310661	0.59042	3.58811	15	1.21301	37.632	86.8938	2.26651	48.7632	65.4906	123.782	20.1041	12.0265	19	2000	6500	0.415384	1000	10576.2	13.0971	3.57919	3.29413	53.1547	5.66065	6	50.1923
135	Shiva	51.4693	35.68	0.542845	25494	29.6076	5.19027	0.171386	1.05325	1.12642	46.8605	2.397	7	0.240118	27.0372	81.1889	2.26103	51.4873	66.2415	116.28	19.7994	10.7627	19	1500	1000	5.52645	1000	46963.7	8.09518	3.53425	6.94673	47.5155	4.3775	2	15.5165
136	Masudiyeh	51.4986	35.6286	2.72753	77502	45.7292	9.11624	0	2.20617	0.507113	0	0.056392	15	0.696293	25.2902	72.6233	2.02409	41.8163	34.6284	75.464	23.7	8.25403	19	3500	2000	3.18375	1000	28414.7	8.41491	2.81306	4.39344	51.2036	3.83861	35	46.4365
137	Eslamabad - Valfajr	51.4971	35.6394	1.55338	33395	33.7493	6.69039	5.3e-05	1.49989	0.870799	0	2.48976	15	0.63597	25.6882	74.0401	2.06512	43.2408	39.5481	81.8159	23.0356	8.66852	19	3500	1500	4.06781	2000	21498.3	8.27926	4.27179	5.36308	48.0898	3.66821	16	50.4938
138	Sahid Borujerdi	51.4689	35.6373	0.722477	10285	3.10362	2.02118	0.085728	1.00389	0.223483	0	5.87717	10	0.131474	27.2511	80.8143	2.20866	47.8459	58.1327	105.037	20.3652	10.2208	19	2000	500	3.74191	3000	14235.7	2.85357	4.31044	3.26689	39.1179	4.40447	9	85.3094
139	Amjadiyeh	51.4283	35.7111	0.708649	9465	27.3616	7.2101	1.16786	18.8244	7.18905	0.094439	0.725003	4	5.02973	39.1385	85.31	2.80557	54.2784	70.5498	122.708	20.8345	15.4662	19	1000	1500	5.90248	1500	13356.4	2.04685	4.9653	12.8685	33.9307	4.07818	11	106.75
140	Baharestan	51.43	35.6944	1.52371	15819	44.3211	5.22878	1.64113	12.3685	3.35493	13.0509	0.295154	4	4.25854	37.5073	91.1207	2.76968	70.4915	100.2	166.162	20.0662	15.4638	19	500	1000	9.6457	1500	10381.9	4.40193	4.31299	9.58973	43.0498	3.79923	24	139.566
141	North Khaniabad	51.3835	35.6426	3.59132	35251	13.5143	8.15752	0.164928	1.38049	1.09384	0.06252	0.056764	9	0.586587	34.9936	71.9356	2.77215	53.8762	79.3418	134.335	20.4126	16.8551	19	1500	1500	0.197125	1500	9815.61	7.43392	4.02428	6.13032	41.5686	2.52191	43	118.406
142	Emamzadeh Yahya	51.4346	35.6793	0.689181	11846	47.5277	7.40786	0.684646	7.69867	2.96954	66.426	0	4	3.59661	36.3941	92.3256	2.73249	72.7631	104.173	172.029	19.8653	15.3087	19	1500	1500	5.49181	1000	17188.5	17.6444	3.66575	6.29748	57.338	7.04879	9	76.4149
143	Pamenar	51.4249	35.6813	1.21011	3596	100.673	8.41989	0.912868	13.0383	2.78642	44.0189	0.094152	4	5.15063	40.0952	100.943	2.88779	86.6709	127.585	206.853	19.9604	17.2711	19	1000	1500	4.63705	2000	2971.64	13.7441	4.90264	9.23248	47.7233	5.4505	8	155.324
144	Piruzi	51.4865	35.6954	0.731333	20374	15.3346	8.41442	0.002917	8.4194	2.38234	0	0.587829	9	0.376147	22.2415	64.0996	2.06208	53.4578	58.4922	111.715	23.4481	10.2557	18	500	1000	9.70195	500	27858.7	3.5171	3.51194	9.03112	35.709	1.98783	47	210.387
145	Delgosha	51.4553	35.681	0.470833	22193	17.8033	6.93102	0.422462	5.31181	2.5694	45.1457	0.146621	6	0.195542	29.895	84.0407	2.40855	55.8305	74.6633	128.298	19.6052	11.9899	19	1000	1000	4.83698	1500	47135.6	4.60453	3.89052	7.46181	43.0136	3.55968	2	17.5395
146	North shariati	51.3729	35.6379	0.866396	25702	17.9483	10.3703	0.091852	1.31011	1.80134	0	0.132474	8	0.721193	36.3959	80.206	2.51048	51.6932	72.6958	129.706	20.1855	14.2305	19	1000	3000	4.07203	1500	29665.4	8.94853	4.16687	5.33811	43.8821	3.20987	46	168.034
147	Dolatabad	51.4524	35.6212	3.39995	56725	28.7496	17.5152	0.223154	1.69791	1.10299	0.412754	11.2846	15	1.38877	30.3413	79.939	2.37648	50.9618	65.3172	115.879	20.6604	12.0524	22	1500	1500	3.40013	1000	16684.1	6.84607	3.76037	6.39753	42.3946	3.56986	56	97.6439
148	Mansuriyeh-Mangol	51.4377	35.6092	0.46438	12755	17.8369	15.683	0.337226	1.13356	1.64942	17.1174	3.85202	15	0.383062	32.2479	80.0103	2.46184	52.5317	70.2229	123.241	20.4902	13.0979	22	2000	500	7.39197	2000	27466.8	7.00232	3.10683	6.64837	44.3817	4.45316	11	84.6347
149	Shahadat	51.4479	35.6135	1.3337	45686	17.0111	15.8508	0.241203	2.40618	1.68271	5.76738	5.93111	15	1.10527	31.1359	79.971	2.40998	51.5695	67.0938	118.62	20.6413	12.4493	22	1500	1000	4.23395	1500	34255.1	9.10411	3.56019	5.39115	43.6338	3.32487	8	21.3899
150	Deylaman	51.4325	35.6033	1.04336	31665	14.0908	8.87689	0.398948	0.741634	2.01391	6.29595	8.98827	15	0.294876	32.7542	80.2036	2.46948	52.6761	70.8486	124.459	20.4637	13.2404	22	1500	1000	6.0891	2500	30349.1	7.72749	3.90154	7.11827	40.7758	4.51287	17	55.8789
151	Gozar Paien Dulab	51.4532	35.6653	0.592342	25368	38.0048	6.27797	0.336635	5.41751	2.12231	42.5273	0.012586	7	0.341299	26.5884	88.382	2.20976	48.3206	65.4437	112.32	18.2119	10.06	19	1000	500	5.35108	500	42826.6	6.67296	3.61204	7.27688	42.378	3.68969	46	170.004
152	Tayeb	51.4502	35.6602	0.797802	27707	56.5203	7.21903	0.337152	4.2339	1.85896	68.4922	0.120618	7	0.392689	27.307	87.5719	2.25222	49.4371	66.9864	114.962	18.4342	10.4849	19	1500	500	3.89846	1000	34729.2	11.2142	3.49637	8.17844	45.8667	4.69196	37	127.918
153	Abuzar	51.4772	35.6507	2.89683	66341	11.2217	3.17168	0.0693	1.74336	1.08023	0	2.15951	10	0.173811	25.2911	85.0425	2.11687	44.8853	56.1378	100.003	19.1025	9.18009	19	2500	1000	7.05814	3000	22901.2	5.02036	4.03538	5.21096	43.6939	2.61528	27	42.381
154	South Afsariyeh	51.4899	35.6447	1.06224	41976	46.7891	5.48717	0.011939	2.30568	1.7286	0	3.3277	15	0.468843	26.1394	77.4387	2.12478	45.2493	48.0557	92.3273	21.6574	9.27283	19	2500	1000	6.49087	3000	39516.6	6.84619	3.86791	6.1821	47.8101	2.62769	46	107.403
155	Razaviyeh	51.4958	35.612	1.04792	41410	27.9027	4.47174	0	0.924376	0.515222	0	0	15	0.241403	26.634	74.5376	2.12189	45.0131	44.391	88.57	22.7309	9.30119	19	3000	3500	2.82514	1000	39516.5	11.7591	3.44353	2.9389	52.6181	4.39507	28	68.3511
156	Hashemabad	51.4716	35.6438	0.927673	24393	10.2059	3.50497	0.070774	1.60762	0.617193	2.70316	5.58918	10	0.130979	26.2724	83.3347	2.16717	46.3686	57.3764	102.731	19.6228	9.70256	19	2500	500	5.44209	3500	26294.8	10.9121	3.57403	5.62866	51.9779	4.407	27	106.984
157	Apadana	51.3287	35.7067	2.2021	18210	4.65089	8.962	0.067677	1.72483	0.899142	0	4.99273	8	0.290335	34.2429	91.6217	2.61111	52.296	77.7691	129.352	19.2886	12.3899	18	1000	1000	1.63975	2500	8269.39	1.22965	5.10529	7.83086	29.1531	6.68314	11	62.9961
158	Besat	51.4306	35.6377	1.50816	10203	27.8975	22.4324	0.267492	0.410152	0.768181	0.423643	0.130898	8	0.288804	32.7873	78.9633	2.59254	55.1551	77.2449	131.713	20.1356	14.4568	19	1500	1000	3.6608	500	6765.19	9.01877	3.26774	4.86132	48.6209	3.38136	6	63.3269
159	Nourth Kiyanshahr	51.4466	35.6405	2.29022	45560	17.5606	10.0018	0.204302	0.585997	0.612813	2.33027	0.163201	9	0.163142	30.0266	82.5197	2.39753	51.9416	69.9525	120.933	19.7345	12.207	19	1000	1000	2.9248	1500	19893.3	9.53922	3.98435	3.95522	50.8835	3.41967	33	72.7947
160	Takhti	51.4157	35.6249	1.33312	21450	21.2131	13.6008	0.20216	0.362999	1.54526	3.03896	4.01636	10	0.309434	34.0065	75.9765	2.64705	54.1802	77.2003	132.107	20.3723	15.5264	22	1000	2000	5.27414	1500	16090	8.69125	4.45187	7.10956	43.3618	3.4965	16	75.036
161	Khazaneh	51.4212	35.6401	1.37119	38240	35.3701	11.3883	0.361695	0.576524	1.74168	26.5117	5.07007	8	0.637052	33.7734	75.2991	2.71282	55.8695	80.4459	135.654	20.3053	16.0403	19	1000	1000	4.96383	1000	27888.2	13.2081	3.93996	7.82165	43.6346	1.72856	60	150.947
162	South Aliabad	51.4254	35.6267	1.33798	30265	18.3773	27.8677	0.173662	0.252766	0.946208	5.70206	1.21461	9	0.208678	33.2724	77.735	2.59639	54.227	75.9793	130.374	20.3045	14.7263	22	1000	2000	3.5992	1000	22619.9	8.60706	3.85628	5.09499	43.5529	3.20502	23	76.1907
163	Aliabad and East Nazi Abad	51.4143	35.6387	0.702555	17322	37.6039	6.4311	0.343035	0.891877	2.57579	9.28433	10.5052	8	0.705361	34.1274	71.7431	2.78718	55.186	81.0931	135.828	20.4779	17.2606	19	500	1500	4.09751	1500	24655.7	8.13655	3.8847	7.62037	42.7585	2.35539	3	26.6082
164	Nazi Abad	51.403	35.6421	2.34697	46201	26.0555	5.5147	0.327497	1.2875	1.65839	1.78716	11.7997	8	0.754387	34.1753	64.9104	2.92721	53.8615	82.4238	135.564	20.7967	19.6252	19	1500	1000	6.57302	1000	19685.4	6.64353	3.96892	8.19896	39.3763	1.68827	91	189.431
165	Javadiyeh	51.3982	35.6536	2.9696	47966	23.2848	4.22091	0.301258	1.47192	1.88674	22.6615	1.68679	7	1.15918	34.6017	69.3623	2.88722	56.3838	83.035	138.394	20.3843	17.5431	19	500	500	3.00498	500	16152.4	9.1664	4.56577	7.14048	41.11	3.26898	79	159.4
166	Kosar	51.4386	35.6632	0.82156	26493	63.378	7.26967	0.434696	4.13914	2.3333	45.8201	0	6	0.677465	32.1122	86.8825	2.51585	59.2001	82.6019	139.367	19.4675	13.1626	19	1000	500	7.56534	1000	32247.2	6.26219	3.12124	6.46208	44.3306	3.07628	43	153.418
167	Nabi Akram	51.4763	35.6829	0.608716	31263	13.7714	3.05683	0.104275	2.0846	1.18291	0.056705	4.40003	8	0.238025	26.134	75.9119	2.2304	52.6731	65.1786	116.69	20.8382	10.7233	19	1000	2000	4.4239	1500	51358.9	5.47593	4.38225	7.56485	44.2464	3.09311	14	47.8084
168	Shahin	51.4588	35.6738	0.426331	15977	15.5617	5.58736	0.340207	2.73816	2.1385	26.2674	0.348895	7	0.217099	27.1911	86.5287	2.24825	49.9638	66.7921	115.251	18.6955	10.4695	19	1000	500	4.95154	500	37475.6	6.71931	4.66683	8.65619	43.8171	4.31871	9	59.8903
169	Aref	51.4517	35.6701	0.521282	18773	23.1576	5.10995	0.400876	6.71494	2.47911	21.4648	3.8e-05	6	0.274279	28.2689	87.2548	2.30613	52.0126	70.4598	120.72	18.7084	11.0051	19	1000	1000	6.75928	1000	36013.1	5.50353	3.64801	7.6333	41.8893	2.32781	22	111.607
170	Taxirani	51.4876	35.6719	1.06527	25120	3.6882	2.34404	0.115824	0.934397	0.372149	0	16.6799	9	0.219298	25.7172	78.9128	2.17809	49.8564	61.9049	110.817	20.1715	10.1572	19	1000	1000	7.40251	2500	23581	4.87826	4.61954	5.56131	35.9549	4.30732	6	29.8833
171	Parastar	51.4861	35.6883	1.18961	45555	11.9681	6.64364	0.022467	4.75258	1.92262	0.23959	2.8277	9	0.24954	23.3838	67.0818	2.11328	53.4059	60.511	113.424	22.7666	10.4065	19	1000	1500	7.32613	500	38294	2.9075	4.41683	7.36911	36.5322	4.19273	30	66.6396
172	Zeynabiyeh	51.5075	35.709	1.24485	7673	3.95234	1.32378	0	1.97221	0.482726	0	1.19802	15	0.323991	25.6122	66.3136	2.27943	56.7281	68.3464	124.28	21.79	11.0754	18	1500	1500	4.46982	500	6163.8	0.696916	2.42775	0.325818	9.81211	15.0267	1	22.6024
173	Shora	51.4965	35.7102	0.726117	26696	8.34293	2.1095	0	6.19768	1.66196	0	4.6279	9	0.704389	25.2974	66.1069	2.25688	56.3486	67.1524	122.77	22.0076	11.0305	18	1500	1000	12.3374	1000	36765.4	2.69292	4.59362	8.17351	37.3262	2.07522	14	55.1299
174	Tehranpars	51.5206	35.7262	2.40703	56873	15.0809	6.16154	0.00137	8.51245	1.34839	0	1.68223	15	0.665302	29.7211	66.9765	2.58051	62.1007	82.7015	143.297	19.4365	12.0889	18	1000	500	9.13284	1500	23627.8	1.73657	5.42739	9.95024	36.7564	2.7201	87	149.071
175	Javadiyeh	51.5492	35.7322	1.77071	60884	20.508	30.0268	0.084483	1.412	0.838325	0	0.063753	15	0.201626	30.1865	70.4239	2.5263	59.4058	78.7543	136.611	19.8585	11.6748	17	500	2500	7.77217	1500	34384	6.58535	4.19657	4.0996	54.8334	5.58603	36	60.0544
176	Safa	51.4523	35.6945	0.868969	22277	36.3827	8.19282	0.513838	6.48078	2.86525	25.8017	0.001544	5	1.00566	32.5497	81.8592	2.54509	58.8557	78.1607	134.64	20.3076	13.2207	19	1000	500	8.22785	3000	25636.1	5.77481	4.16971	7.49203	44.5541	4.98272	19	84.4028
177	Abshar	51.4422	35.6787	0.771348	24111	19.2694	4.68939	0.568404	8.32571	3.2039	31.1427	0	5	1.35049	33.5572	88.1028	2.5964	64.3865	89.7314	150.683	19.6855	13.8465	19	1000	1500	9.56253	1000	31258.2	4.64443	3.54235	7.56916	42.1556	2.62121	22	89.734
178	Sad Dastgah	51.4721	35.6889	0.663099	24584	15.3304	4.76145	0.109592	5.23181	2.01136	15.2178	0.642051	7	0.331328	26.8426	74.3441	2.27495	54.4819	67.3503	120.593	21.2025	11.1562	19	500	1500	5.43684	1500	37074.4	3.5002	5.22286	8.06215	39.7593	2.81077	15	62.9406
179	Dehqan	51.4767	35.6959	0.577699	30340	12.0253	3.85826	0.022606	6.03183	2.52466	5.61813	0.454967	7	0.439606	25.4483	69.542	2.2191	54.6748	64.7635	118.593	22.1267	10.9645	18	500	1500	5.66495	1500	52518.7	4.51112	5.26294	9.76269	40.0134	5.23731	17	58.0913
180	North Chitgar	51.1862	35.7243	0.490078	4384	15.7746	35.0621	9e-06	2.25651	1.5484	0.147858	18.331	25	0.128509	31.0518	82.4539	1.63998	43.5254	54.5133	98.2853	19.4891	9.34269	18	1000	20000	5.02598	3500	8945.52	6.52395	4.65866	5.74817	45.5124	3.83212	1	45.8168
181	shahrak esteghlal	51.2282	35.7028	11.6602	6873	3.5846	12.4095	0.061586	0.306035	0.074146	0	3.54719	20	0.185242	30.3251	78.14	1.4946	42.777	52.478	95.4286	20.7554	8.11566	19	2500	9500	1.38325	1500	589.44	7.20517	9.52036	4.16121	41.1682	4.685	7	94.4179
182	Esmaeil abad	51.3344	35.6191	1.72243	7140	3.93687	7.21186	1e-06	0.000659	0.36511	0	2.63136	15	1.26658	36.5361	85.8902	2.33511	49.9421	69.9022	126.764	20.0369	12.1138	19	1000	6000	1.66444	1500	4145.32	14.7819	3.69632	4.39776	46.5601	7.63305	1	33.5168
183	Moghadam	51.3746	35.6562	0.496655	15902	27.8435	12.519	0.269059	4.735	1.7728	56.3834	2.01623	6	0.693671	34.8721	75.735	2.75759	56.2271	80.4752	136.832	19.8992	14.3615	19	500	1500	7.34212	1500	32018.2	11.953	3.8064	6.77902	46.6418	4.06867	16	96.9143
184	Zam Zam	51.3679	35.6479	0.460256	11040	28.6705	22.7778	0.296309	2.41181	1.62533	16.7316	0.222313	7	0.726155	35.4032	79.1943	2.63024	54.1061	78.2126	134.546	20.0721	14.2067	19	500	2500	8.05034	1500	23986.6	11.2916	4.98496	5.19022	48.7964	5.16304	28	214.887
185	Shokufeh	51.368	35.6262	1.14867	24917	6.25809	2.28978	0.015707	0.726369	1.61782	0	0.281399	10	0.46541	39.2158	88.9486	2.10441	46.4119	58.7365	118.868	20.0379	11.6128	19	1500	4000	4.27609	1000	21692.1	10.4899	3.60598	4.16984	46.5107	5.18923	15	62.1932
186	Shahid Kazemi	51.356	35.6168	2.43849	11017	2.24958	1.77865	0.000998	0.007734	0.346277	0	1.6509	15	0.65353	39.0175	89.102	2.11725	46.6528	59.4634	119.355	20.0399	11.523	19	2500	5500	1.25208	500	4517.96	13.6907	3.28121	2.94091	55.703	5.03767	1	17.2583
187	Fath	51.3011	35.6769	2.26537	5340	31.6197	70.7143	8.1e-05	1.87445	0.109634	0	0.013674	15	0.18621	32.4986	78.6643	2.72579	47.3849	76.2898	123.725	21.1543	10.0729	19	3000	4000	3.40044	4500	2357.23	1.12735	5.18147	0.430712	10.9223	22.1536	7	111.515
188	Pasdaran	51.2688	35.6891	8.37649	49090	6.19948	7.54888	0	0.768088	0.288653	0	0	15	0.203398	32.1881	82.1815	2.20121	46.1628	66.2256	112.53	19.9382	10.1356	19	2000	6000	1.51143	2500	5860.45	3.43699	5.35998	4.23712	36.7815	6.66327	15	33.4013
189	Enqelab	51.4026	35.6983	1.15183	12211	60.9153	8.24078	1.83118	22.4596	7.62114	2.01414	1.14325	2	6.14124	36.691	88.5401	2.69531	65.2463	92.5929	154.624	19.9361	14.257	19	500	500	12.4936	1000	10601.4	2.66192	3.90899	10.7608	39.6073	10.2776	45	309.323
190	Shamshiri	51.3424	35.6704	0.956495	23802	23.57	12.5155	0.271121	6.023	2.23638	21.2656	15.8714	8	1.80214	32.9642	95.1594	2.26122	48.4344	90.62	139.089	20.4173	11.7597	19	2500	1000	6.62375	1000	24884.6	4.94005	3.35702	6.14654	36.7689	5.01218	14	61.0548
191	Anbar Naft	51.3917	35.6628	0.664087	13443	77.3286	5.0692	0.260001	2.57974	2.91754	48.1898	0.311667	5	1.8827	34.7626	69.481	2.90232	57.6831	77.3493	133.78	19.5743	13.686	19	1000	500	7.27996	1500	20242.8	9.45469	3.27173	5.3857	46.2572	7.86283	18	123.368
192	Sangelaj	51.4127	35.6764	1.64035	24878	66.5055	6.10222	0.602602	9.78706	4.14098	64.8825	0.687166	4	3.04571	40.8691	101.405	2.94422	89.5292	132.235	213.908	19.929	17.6663	19	500	1000	4.05516	1500	15166.3	8.09038	4.89582	8.18394	43.7834	3.91511	29	112.273
193	Bashgah Naft	51.2578	35.7005	2.06249	63382	15.6005	8.34133	0	3.20081	0.990592	0	0.000981	15	0.612766	31.0709	81.6839	1.69167	43.3842	56.0799	99.6301	19.8784	9.02227	18	2500	7000	4.20673	1500	30730.9	2.84607	5.0334	3.92856	44.5998	6.76375	11	20.2094
194	West Tehransar	51.247	35.6925	0.663317	11725	11.7467	6.06984	0	1.78636	0.63306	0	9.00117	15	0.676414	31.1906	80.8727	1.78831	44.0916	57.9165	102.251	20.0816	9.17415	18	2000	8000	6.89926	1000	17676.3	5.79455	5.22814	6.29424	43.2219	5.21962	27	198.242
195	Darya Town	51.2387	35.6857	0.564112	9385	2.06838	1.25256	0	0.061484	0.189731	0	12.431	20	0.297862	31.429	81.0742	1.8836	44.7252	59.7198	104.771	20.0218	9.48605	19	2000	9000	6.27271	1500	16636.8	3.88643	5.58436	6.06287	47.0383	3.39904	3	43.4884
196	Nemat abad	51.3528	35.6297	1.54645	37514	69.3312	18.3543	0.05447	0.23537	1.5418	12.6294	3.33514	10	1.39313	37.9993	87.1831	2.24138	48.4144	64.5436	123.287	20.0724	12.0495	19	1000	4500	3.81355	1000	24258.1	14.0765	3.39914	4.67825	43.6115	4.89684	42	109.352
197	Bahmanyar	51.3984	35.6251	1.13646	14516	12.2821	6.24198	0.113556	1.50261	1.0731	0	8.50702	10	0.584849	34.9175	74.6173	2.66472	53.1104	76.8582	132.183	20.4241	16.0515	22	2000	3000	4.05525	2500	12773	7.37977	4.02456	5.18049	45.6389	7.6674	13	87.5232
198	Yakhchi abad	51.4054	35.6263	2.41775	54553	21.3274	9.45501	0.175282	0.97082	1.56071	0.04323	9.79077	10	0.542682	34.3793	73.3879	2.70456	53.7381	78.2536	133.132	20.465	16.3968	22	1500	2500	4.69124	2000	22563.5	10.0556	4.95024	6.90888	41.9528	2.23269	36	66.6462
199	Javanmard Qasab	51.4271	35.6146	3.19442	23773	13.7196	22.9341	0.357904	0.406574	1.15121	2.33354	4.24934	15	0.185511	33.0591	79.3484	2.51888	53.3102	73.1944	127.348	20.3575	13.7981	22	1000	1000	2.96832	2000	7442.04	9.42517	4.54711	4.50511	44.7309	4.564	26	105.732
200	Abbasi	51.3854	35.6642	0.50748	17798	64.9986	6.11218	0.267071	2.44599	2.82572	6.25017	1.85848	5	1.56394	34.5861	68.6183	2.90074	56.8646	74.9182	130.739	19.4386	12.9623	19	500	500	8.38509	2000	35071.3	12.4284	3.18398	5.79279	49.4739	4.36566	22	116.808
201	helal Ahmar	51.3896	35.6706	0.805961	12073	105.23	6.59516	0.316467	3.23042	3.32034	30.8977	2.03062	4	1.67415	34.2587	63.0327	2.97255	55.4017	67.9392	122.192	19.1095	11.5397	19	500	500	6.29777	2000	14979.6	10.247	3.44318	5.5827	52.6432	6.67605	15	114.75
202	Bolursazi	51.3792	35.6629	0.927763	21020	42.5489	7.71622	0.279368	3.0555	2.37687	26.0209	3.22045	6	1.02222	34.6718	72.1059	2.84088	57.033	78.1661	134.5	19.6056	13.5376	19	1000	1000	7.75719	1500	22656.7	10.5225	3.86253	7.81637	42.132	4.87155	21	97.0796
203	Yaft abad	51.3503	35.6581	1.00423	25677	104.522	23.6363	0.590116	6.69211	4.18252	9.32061	8.7589	8	0.871747	34.3702	86.2141	2.52509	53.1805	84.0716	138.132	19.99	12.7871	19	2500	1500	6.63128	1000	25568.7	9.69232	5.03703	6.54671	45.2325	3.30646	15	60.5522
204	Azari	51.3509	35.6667	0.578371	20985	64.9097	20.7888	0.471356	7.51213	2.7077	25.6745	13.1798	7	1.64956	33.7703	88.753	2.47715	52.9688	87.8529	140.919	20.0384	12.4971	19	3000	500	7.21635	500	36282.9	9.13319	4.8552	5.89469	49.3113	5.91851	25	113.81
205	Soleimani	51.3639	35.6722	1.07042	46234	56.3265	9.97664	0.504731	4.25342	1.84495	34.4454	4.45592	6	1.30344	34.2994	82.1608	2.68155	58.16	86.9921	144.713	19.5035	13.0675	19	2000	1000	7.70868	1000	43192.4	6.76243	5.35317	6.7764	46.9947	3.79158	13	31.2821
206	Jey	51.3567	35.6752	0.553809	21652	46.8548	11.9058	0.488149	4.38436	1.19771	2.3749	5.83309	6	1.73476	33.8402	87.2882	2.56722	57.0094	91.0297	147.769	19.6262	12.804	19	2500	1000	8.04586	1500	39096.5	7.56554	4.1495	8.27175	44.768	5.3898	28	122.854
207	Baq Khazaneh	51.3707	35.664	0.609856	22640	43.7703	9.77427	0.376448	5.28666	2.90072	17.495	4.32706	6	0.959936	34.6609	77.1468	2.75442	57.1011	81.5022	138.222	19.6292	13.3925	19	1500	500	6.32406	1000	37123.6	7.78437	3.6638	7.85336	39.8702	3.42314	39	160.835
208	East Abuzar	51.3674	35.6593	0.400491	23617	38.3987	13.5643	0.423202	7.89073	3.79027	60.1619	3.26311	6	0.880775	34.7585	78.9987	2.70152	56.159	81.8801	138.233	19.7941	13.6624	19	1000	1000	6.66352	1000	58970.1	11.4849	4.07742	7.18127	44.4517	4.38667	16	68.9558
209	Emamzadeh Hasan	51.3607	35.6654	0.522922	14470	74.6615	15.7	0.512411	6.3517	3.60184	47.1573	5.95236	6	1.20129	34.3489	83.1149	2.62981	55.9175	85.1889	141.066	19.7614	13.0785	19	2000	500	6.035	1000	27671.4	10.0182	3.83229	6.48238	43.0936	5.34209	18	116.168
210	Golchin	51.3672	35.654	0.468851	21311	31.7006	19.136	0.402867	6.74637	3.13432	17.5384	1.61955	7	0.743668	34.9969	79.1138	2.67469	55.2906	80.5862	136.818	19.9407	13.9547	19	1000	1500	8.44683	2000	45453.7	11.6641	4.06741	8.37126	41.739	3.89001	18	83.6471
211	Vasfenard	51.3551	35.6469	0.622747	19681	62.5194	27.3738	0.478426	1.60739	2.63616	22.7529	2.07829	8	0.84644	35.5092	83.4399	2.53012	52.9109	77.8759	133.852	19.9819	13.2212	19	1500	2500	6.38666	500	31603.5	10.218	3.42909	4.84223	49.8027	5.37066	11	58.933
212	Shahid Avini	51.4276	35.5852	0.608097	10327	15.7616	9.5117	0.223834	2.15956	1.02002	43.9152	10.5345	15	0.210061	32.7403	80.5686	2.45108	52.6105	71.4183	125.588	20.4697	12.7176	22	1000	2500	5.04481	4500	16982.5	5.81247	4.12296	5.26774	45.8593	5.50014	9	85.0431
213	Hamzeh abad	51.4238	35.5975	1.12568	18359	11.0167	9.62753	0.382776	1.81185	1.90575	4.9033	9.83318	15	0.129004	33.076	80.1706	2.47552	52.8578	72.3481	126.86	20.4052	13.1182	22	500	1000	7.06194	3500	16309.3	6.90784	4.17227	5.50684	41.6245	5.14734	20	104.449
214	Taqi abad	51.4631	35.5796	0.487952	7290	4.23978	7.74798	0.068799	0.013137	0.123784	4.2988	4.65061	15	0.003759	31.1916	80.1955	2.37717	51.1166	65.1499	116.537	20.9022	12.0562	22	3500	2500	0.137397	5000	14940	14.1495	2.6894	3.64883	54.4697	2.94925	12	138.641
215	Firuzabadi	51.4334	35.5953	0.830556	28303	22.9503	4.12165	0.387961	2.88165	1.95947	11.6357	11.3159	15	0.437332	32.6697	80.4608	2.4529	52.4998	70.3703	123.967	20.5009	12.9843	22	1500	1500	5.4296	3500	34077.2	6.89074	3.66248	8.08748	42.5176	3.70279	35	119.128
216	Ebn Bavieh - qauri	51.4412	35.6028	0.430531	8468	24.4163	11.1654	0.313457	0.70391	1.49068	0.037984	4.68165	15	0.452089	32.037	80.2034	2.43796	52.1611	68.949	121.629	20.5771	12.8132	22	2000	500	5.36329	2500	19668.7	5.97537	3.52144	6.62494	40.0149	4.01512	12	124.555
217	Safaiyeh	51.4498	35.605	1.03811	9373	22.004	10.5512	0.222367	0.77183	1.12458	9.87838	1.22683	15	0.470745	31.2245	80.0051	2.40032	51.4187	66.476	118.029	20.7299	12.3468	22	2500	1000	3.64102	2500	9028.94	9.30801	3.55983	6.7321	43.4768	2.45386	6	67.5321
218	Nafarabad- Hashemabad	51.4406	35.5847	1.00538	14401	13.7702	1.57576	0.293675	0.888395	1.05767	18.2464	11.8862	15	0.3499	32.2637	80.6162	2.4279	52.1551	69.0657	122.148	20.6036	12.6235	22	1500	2000	2.02035	4500	14323.9	6.30886	4.59506	6.2079	40.1122	4.1386	32	196.502
219	Estakhr	51.4458	35.59	0.442151	12433	15.2031	3.50825	0.328348	1.05984	1.02541	14.0357	10.7746	15	0.417699	31.9438	80.4472	2.41599	51.8449	67.8121	120.286	20.6758	12.551	22	2500	1500	4.42341	4000	28119.4	6.14234	4.98239	6.86882	40.0857	4.61675	6	54.2505
220	Alaein	51.455	35.5829	1.42514	4021	5.3707	5.65566	0.189189	0.152697	0.386843	2.58405	9.14128	15	0.100614	31.5434	80.3663	2.39444	51.462	66.3903	118.289	20.7964	12.2713	22	3000	2000	2.59175	5000	2821.48	2.86885	4.50881	2.48694	42.7865	8.50535	14	230.039
221	Beheshti	51.4211	35.5806	1.08256	18065	10.6129	10.7395	0.107145	0.879071	0.513732	7.132	10.4557	15	0.041749	33.0873	80.8864	2.45358	52.6495	71.8263	126.387	20.4292	12.7569	22	500	3000	3.07906	5500	16687.2	6.25	3.70727	5.53557	40	4.70523	6	39.8322
222	Keshavarz	51.3993	35.7135	1.49358	14431	24.0934	6.96033	1.28247	20.1736	10.2198	0	3.93737	3	5.83065	35.4175	87.9198	2.36062	50.0237	69.2311	117.716	20.5632	12.0096	19	1000	1000	6.08912	1000	9662	2.40156	4.82249	11.2674	34.2931	12.5424	9	65.164
223	Vesal Shirazi	51.3991	35.7053	1.2439	10875	32.6289	8.05649	1.65144	21.8604	9.76481	0	3.85787	2	7.05133	35.7053	87.562	2.52708	56.8313	79.7627	134.441	20.187	12.9507	19	1000	500	10.2697	1500	8742.68	1.27747	3.77199	8.43218	33.3203	36.2391	5	53.1451
224	Jamalzadeh	51.3845	35.7067	1.5034	25306	22.6	6.38798	0.79366	13.2993	7.63326	2.10375	15.13	3	2.99824	34.5649	87.1971	2.386	52.6506	73.9749	125.306	20.1305	11.9056	19	1000	1000	8.43175	1500	16832.5	2.13886	5.02488	10.6971	38.1016	7.57528	17	68.3766
225	Fatemi	51.3891	35.719	2.15438	37427	12.2839	3.75948	0.643631	7.74878	5.4243	0.247066	8.63928	4	2.21823	34.4078	89.0145	2.13499	44.3461	61.4832	104.695	20.8119	10.7023	19	1000	1000	5.23526	500	17372.5	1.46916	5.27724	9.97943	34.545	18.4172	28	75.0643
226	Iran	51.4399	35.6876	1.20635	22470	25.9726	3.97554	0.9453	8.66503	3.2319	11.1462	0.053318	5	1.9317	35.0671	88.3657	2.66898	66.8481	93.3353	156.264	19.9731	14.5064	19	1000	2000	5.73724	2000	18626.4	2.66187	3.01256	8.06409	33.9427	1.94036	25	107.208
227	Shahid Bageri	51.2022	35.7611	1.26377	13532	0.003836	0.191132	0	0.021592	0	0	13.893	25	0	31.4709	86.5964	1.64083	43.2201	53.7956	96.7144	18.4015	9.73508	17	4500	20000	4.64572	2000	10707.7	1.58384	5.07072	2.62341	49.2584	6.16317	3	32.662
228	Zibadashet	51.2611	35.7521	1.63425	17431	4.71756	0.674322	0.00134	1.86437	0.63827	0.007537	9.33844	20	0.119918	33.5439	85	1.22499	35.9825	44.4303	80.3009	11.9551	11.7686	16	4500	6000	7.77063	1000	10666.1	4.49732	6.06898	8.92089	43.9553	4.22236	4	31.3316
229	South Chitgar	51.1601	35.7179	8.3487	1552	3.96251	15.0708	0	0.421855	0.24216	0	0.024582	30	0.02887	31.438	82.8785	1.79823	44.7607	57.4946	102.622	19.3457	9.94038	18	1500	20000	0.892148	1500	185.9	4.80501	8.08477	5.79897	46.9758	3.15722	2	94.9304
230	Sohrevardi - Bag Saba	51.4349	35.7208	1.09523	21003	11.7502	3.62909	0.480422	16.8843	5.91599	0.376969	0.615342	5	1.67103	41.9349	84.3835	2.9141	46.5113	54.451	99.7076	21.5723	16.8124	18	1000	2500	8.3268	1000	19176.7	1.93058	5.10089	12.4268	37.0647	4.07085	20	93.0036
231	Darus	51.4562	35.7735	1.9849	32579	6.09788	0.700603	0.183789	11.615	2.8468	0.669475	3.12867	15	1.33845	33.2438	83.3266	2.10823	44.0304	68.2924	111.958	19.9691	7.36376	16	2000	2000	5.84354	3000	16413.4	1.43645	3.87946	12.637	28.9134	4.0609	18	57.2492
232	shohadaye gomnam	51.4845	35.6616	1.19389	30835	9.82778	3.56253	0.117695	2.00255	1.08089	0	5.94085	9	0.144449	25.419	84.1762	2.13576	46.5246	59.3141	104.828	19.0624	9.48539	19	1000	500	8.15429	2500	25827.3	4.16725	4.34904	5.67861	38.6161	2.23772	5	21.9099
233	North Dolatkhah	51.343	35.6265	0.574276	6623	17.2688	15.3109	0.004743	0.070981	0.875943	0	4.032	15	1.7006	37.2933	86.3534	2.30754	49.36	67.7385	125.541	20.1157	12.1523	19	1000	5000	1.13646	500	11532.8	12.7267	3.56586	4.62026	50	7.62494	3	55.8092
234	Golestan	51.2476	35.7539	1.71134	20279	2.67779	0.91347	5.7e-05	4.8119	0.122385	0	22.2653	20	0.038441	32.4198	85	1.33212	38.55	47.0784	85.4676	14.9247	10.6019	16	4500	7000	6.86446	1000	11849.7	3.65763	5.94667	6.12456	43.9291	3.0968	18	87.3354
235	Qazali	51.1603	35.7319	2.59539	1303	0.946501	14.6304	0	0.046807	0.184202	0	0.330837	25	0.105572	31.4336	83.4903	1.77876	44.6644	57.0231	102.001	19.1723	9.98637	18	2000	20000	0.49011	2500	502.04	2.5	8.56611	9.05602	33.9492	3.45357	2	55.1104
236	Vardavard	51.1313	35.7377	5.48535	12877	3.45802	17.2336	0	0.046266	0.455643	1.24796	0.730792	30	0.11568	31.6329	83.5279	1.87613	45.5125	58.7549	104.66	19.111	10.3671	18	1500	20000	2.41094	3000	2347.53	6.94232	5.65016	6.84166	48.1127	8.63555	8	65.243
237	Sarve Azad	51.1765	35.749	11.8673	16498	0.652357	2.56612	1.3e-05	0.183951	0.185112	0.078723	2.68486	25	0.032839	31.4887	85.2116	1.70751	44.8535	56.6959	101.591	18.9199	9.71382	18	2500	20000	0.435112	4500	1390.2	3.74619	5.45481	4.21869	53.3666	6.19469	4	32.8212
238	Sharif	51.1316	35.7496	6.75852	3087	0.637779	3.80605	0	1.4e-05	0.116332	0	0.032783	30	0.029644	31.7874	84.6973	1.8726	46.3727	59.8281	106.402	19.0033	10.3288	17	2000	20000	0.000193	4000	456.76	1.86207	5.17787	8.13087	52.4543	8.4872	1	55.3813
239	Dehkadeh Olampic	51.2544	35.7638	2.71299	7773	2.34153	0.40973	5.3e-05	0.431295	0.331755	0	15.3079	20	0.17136	32.422	85	1.47083	39.7792	48.8736	88.4085	15.1414	10.9921	11	5500	6500	0.454526	1000	2865.1	2.13523	4.15521	4.41271	26.5204	24.4179	12	132.497
240	Qaem	51.2278	35.7524	2.80444	38624	2.70694	0.707274	0.007587	1.21055	0	0	35.7552	20	0.003605	31.4264	89.6757	1.42643	41.16	50.1511	91.0699	17.6282	9.50071	16	4500	9000	2.05573	1500	13772.4	2.86764	5.88383	5.36972	49.5602	3.93797	20	53.7505
241	Farhangian Town	51.2744	35.7095	4.30282	19558	1.13152	2.66173	1e-06	0.508472	0.657684	0	0	15	0.173377	31.768	86.9513	1.7352	44.0766	57.9575	101.99	18.7374	9.77282	18	1500	5500	3.80605	1500	4545.39	3.22492	6.19248	7.89958	36.0897	5.52204	17	85.7029
242	Ekhtiyariyeh	51.4604	35.7861	2.51059	58651	6.43378	1.24568	0.185489	8.0867	1.60333	1.2426	1.93481	15	1.2114	33.7475	81.6752	2.37032	51.5963	78.9276	129.252	19.9067	8.19696	16	2000	1000	4.11877	2000	23361.4	1.80852	5.44256	12.126	35.0504	3.59755	49	83.2686
243	Zanjan	51.3596	35.6948	0.872606	27971	45.5248	10.1563	0.518941	8.70752	4.91803	37.9054	1.03995	5	2.01885	32.8807	75.1626	2.94689	89.4931	128.084	217.393	16.8772	15.1942	18	1000	1000	8.75442	1000	32054.5	5.10862	6.08297	8.00829	45.2142	6.93576	29	101.106
244	Aqdasiyeh	51.4438	35.5936	0.579451	20110	19.0016	4.82361	0.342042	1.33203	1.1515	7.0978	9.31284	15	0.500396	32.011	80.3998	2.42261	51.9434	68.1793	120.76	20.6444	12.6349	22	2000	1000	5.55821	3500	34705.3	6.81806	4.51649	8.02088	37.8973	2.58081	14	70.7559
245	Zafaraniyeh	51.4149	35.8088	2.37866	32277	7.33549	0.760132	0.861721	10.8284	1.00616	1.27067	10.071	15	2.1314	33.2131	79.1187	2.54718	59.3487	84.3618	141.724	20.1501	8.92984	11	2000	1000	2.98823	2000	13569.4	2.01368	5.36824	14.295	26.9545	5.00047	40	119.879
246	Golabdareh	51.4393	35.8193	0.568589	15342	21.1825	1.37811	0.156704	0.923266	0.479265	10.1785	10.7503	15	0.778331	33.5049	78.9308	2.55219	58.1328	83.4739	139.74	20.0988	9.30347	11	2000	2500	0.36736	3500	26982.6	8.55645	4.59742	7.09164	42.9951	6.30948	3	29.4609
247	valfajr	51.3946	35.7466	1.39384	10903	4.81507	1.99848	0.517048	2.61034	2.74471	0	1.13989	7	0.557867	34.1402	81.5574	2.48608	54.6924	72.1765	125.428	20.4366	11.4555	17	1500	1500	6.31215	1000	7822.28	1.12539	6.38419	14.84	28.9058	11.2171	9	81.5514
248	Emamzadeh Qasem	51.4398	35.8125	1.60205	26003	20.7106	2.40287	0.304625	6.1252	1.57823	1.49749	19.2521	15	1.14485	33.7901	79.5615	2.56875	58.1944	85.267	141.501	20.0845	8.99469	11	1500	1500	2.04177	3500	16231.1	1.4652	5.36312	15.702	31.171	4.53409	14	56.4415
249	Amirabad	51.3909	35.734	2.77155	30768	4.96651	1.50308	0.40362	2.78446	1.87711	0.494821	3.39357	6	0.861838	34.6284	85.4696	2.36814	50.435	68.2029	117.318	20.5157	11.5576	18	1500	1500	5.49037	1000	11101.4	1.48412	5.18224	11.616	32.592	15.6136	16	54.4074
250	Nezami Ganjavi	51.4084	35.7459	0.63918	10490	15.8697	5.4663	0.780088	10.657	6.23444	0	1.09344	7	1.23037	35.6695	81.6652	2.59548	54.192	71.9491	124.557	20.5793	12.0407	18	2000	500	8.06384	1000	16411.7	1.37444	6.70875	16.4919	31.396	4.84271	5	54.6478
251	Shad Abad	51.2987	35.6567	1.08484	12992	12.4446	33.8886	0	0.343682	0.788878	7.2022	3.88424	15	0.20218	32.6295	76.637	2.78361	47.6444	74.987	122.897	21.2453	10.0303	19	5000	5000	1.71498	5000	11976	13.622	3.9377	4.97229	44.2843	4.73368	16	114.412
252	saeed Abad	51.2878	35.6549	1.38676	2440	1.29924	14.1679	0	0.004358	0.102221	0.244506	2.81318	15	0.015496	32.7227	77.3342	2.73403	47.8282	74.4466	122.59	21.0782	10.1744	19	4000	6000	0.159435	6000	1759.49	14.4288	6.02725	4.42623	47.7971	5.36885	2	79.7852
253	Abdol Abad	51.3642	35.635	1.04594	21762	30.5289	14.1921	0.113645	0.66554	2.27018	0	1.07843	9	1.06945	37.5488	85.0562	2.3225	49.5018	66.9958	125.335	20.0894	12.7244	19	1000	3500	6.97161	500	20806.2	14.7035	3.91217	4.98576	39.542	3.12471	27	118.293
254	Farmaniyeh	51.4719	35.7957	1.8618	28325	5.95625	0.677586	0.124959	5.31161	1.92133	0	5.35391	15	1.9794	33.4598	79.9607	2.45391	54.6777	80.9875	134.168	19.8084	9.10833	16	1000	500	4.67864	500	15213.8	1.6575	3.83672	8.82612	36.3962	5.09444	23	80.8904
255	Sahebazaman	51.3224	35.6484	2.95412	26000	11.2198	11.1501	0.032302	0.451385	0.946563	1.73414	1.19513	15	0.430917	33.9455	84.3928	2.51812	50.4916	79.0825	130.946	20.3039	11.6894	19	3000	4000	1.93476	2500	8801.27	10.2352	3.6918	4.30769	47.27	4.5	13	53.0139
256	Hekmat	51.4428	35.8008	1.95412	43440	16.0375	2.99311	0.462692	13.6981	3.20902	2.24492	12.7387	15	1.18519	34.3645	80.9151	2.59592	58.0773	88.6717	144.62	20.0431	8.36372	16	1000	1500	4.02052	3000	22230	2.48233	4.67378	13.5866	34.8263	5.05525	8	22.4216
257	Yusefabad	51.4051	35.7342	1.96318	41432	14.9447	9.6549	0.609699	12.3808	6.19272	0	1.06975	7	1.9998	36.5027	84.3805	2.56113	51.7441	68.5374	118.795	20.6491	12.8284	18	1500	500	7.79945	1000	21104.5	1.92835	5.95664	13.8106	33.704	5.07337	24	59.3403
258	Iranshahr	51.4221	35.7085	1.02361	9569	52.8529	10.5958	1.58978	20.167	8.31144	0	0.639971	3	7.9389	38.1374	86.3692	2.75407	57.7373	77.7725	132.975	20.5305	14.9608	19	500	1000	7.60791	1000	9348.25	1.86794	4.6883	10.7639	37.8076	12.7704	22	192.524
259	Valiasr	51.4127	35.7072	1.52682	13462	61.0614	12.311	1.87839	23.1539	10.875	0	0.851885	3	9.68244	37.2032	87.7857	2.66892	58.8885	81.7564	137.999	20.3542	14.226	19	1000	1000	8.99703	1000	8817.01	1.59034	4.34555	8.81741	41.9969	24.2386	18	123.227
260	Jahad	51.4024	35.725	0.841519	17197	14.2295	7.53997	0.704755	13.8949	6.16426	0	3.51902	4	3.10648	36.0601	86.4982	2.44524	50.144	67.7222	116.406	20.6211	12.4249	18	1000	1000	9.65392	1500	20435.7	2.19971	5.51013	13.8571	37.3793	6.67558	4	31.6924
261	Tajrish	51.4307	35.792	1.96962	22483	18.3166	2.32884	0.53968	11.3561	3.24799	6.31752	6.68972	15	1.86898	35.4738	82.637	2.77545	62.2101	100.613	159.857	20.0608	7.31371	16	1000	500	6.33459	3000	11414.9	1.69282	3.59534	16.3946	28.7607	3.17573	31	130.582
262	Sadr	51.4419	35.7811	0.904454	20504	5.87354	1.24151	0.255856	6.01898	2.55608	2.97534	4.7232	15	0.919179	35.2545	83.3805	2.63537	57.8857	94.5159	149.97	20.0105	7.12723	16	1000	500	4.63175	2500	22670	2.35907	5.26735	11.7538	35.5656	4.24795	11	56.8804
263	Baq Ferdos	51.4236	35.7948	1.88897	17807	12.7009	1.39531	0.623277	10.4739	2.11672	0	13.2319	15	2.11492	34.9569	81.6788	2.72833	61.6473	96.8872	155.79	20.1167	7.68967	16	1500	500	4.34673	3000	9426.85	2.07777	4.69779	16.7743	26.3086	4.42523	10	59.4317
264	South Khalij Fars	51.2715	35.6556	1.9476	30939	0.622072	1.30714	0	0.002695	7e-06	0	0.195546	15	0.006843	32.9081	79.8479	2.57087	48.222	73.3285	121.923	20.6008	10.5612	19	2500	7500	2.07053	5000	15885.7	14.5851	4.23615	3.17722	52.6947	4.17596	3	15.9719
265	Norouz Abad	51.2546	35.6624	1.98878	10739	0.608597	0.142106	0	0.010936	0.002245	0	0.418119	20	0.002563	32.8162	81.5389	2.38504	47.8883	70.7388	118.925	20.2173	10.6267	19	2000	8500	1.2575	4000	5399.79	12.6416	5.14879	3.35227	52.9376	5.23326	5	53.6664
266	Emam Khomeini	51.3142	35.6627	1.82015	12056	84.3738	34.2083	0.000272	2.4338	0.680459	0.294366	1.52519	10	0.409303	32.9012	81.3579	2.65005	48.4764	78.5811	127.356	20.8913	10.6539	19	3500	3500	3.57733	3500	6623.63	7.3079	3.71141	4.4791	44.9565	3.95654	9	75.3579
267	Sadeqieh	51.3512	35.6373	0.377292	6736	76.1729	29.1485	0.18145	0.490649	1.4979	18.4534	2.95533	9	1.18063	36.6523	84.9988	2.39501	50.696	71.362	128.569	20.1022	12.6332	19	500	4000	6.38698	1000	17853.5	8.74215	3.44492	4.48337	52.5121	10.481	11	136.289
268	Behdasht	51.3381	35.6571	1.09367	27193	26.3069	11.9286	0.373966	3.88681	2.23441	0.177694	9.09854	9	0.431708	34.0381	87.8343	2.46645	51.4328	83.8805	136.161	20.1267	12.2124	19	3000	2000	7.05352	1500	24864	6.16364	4.54776	5.31387	44.7458	4.4938	17	64.121
269	Ferdosi	51.4183	35.6935	2.08862	7838	60.2067	6.44994	1.95423	16.8946	5.61164	2.96363	0.191154	3	6.03797	38.9897	95.5711	2.83123	77.7044	112.708	184.668	19.9879	16.2697	19	1000	1000	8.10699	1000	3752.71	3.43866	4.71713	9.21153	41.5054	14.6849	16	168.195
270	Behjat Abad	51.4123	35.7193	0.918147	12519	41.212	15.148	0.943373	21.8612	13.2068	0	0.793405	4	6.16445	37.9579	85.7674	2.65569	52.0031	68.1829	118.497	20.8099	14.0553	19	500	500	8.84579	500	13635.1	1.99428	5.82682	15.0571	36.6486	7.77219	12	92.3033
271	Darvazeh Shemiran	51.4422	35.6963	1.23485	34031	28.2989	6.93277	1.02987	8.53458	4.19321	22.7591	0.19602	5	1.64029	35.1208	85.2789	2.66575	62.2854	85.0517	144.277	20.1917	14.2256	19	1000	1000	7.45424	2500	27558.9	3.595	3.4236	8.12495	39.2483	2.91499	21	63.0859
272	South Yaftabad	51.3017	35.6419	2.23128	30192	5.74448	12.8761	0	0.018636	0.792675	7.29605	2.2407	15	0.204664	33.6598	81.7012	2.57268	49.6452	76.0717	126.88	20.4778	11.2404	19	3500	5500	3.12656	3500	13531.3	10.7623	3.05401	3.73609	45.7622	4.90859	36	115.376
273	North Yaftabad	51.3019	35.6486	1.16197	28526	17.2601	22.1775	0	0.185442	1.32305	10.9248	4.92765	15	0.379714	33.2277	80.2815	2.64112	48.9771	76.2032	125.87	20.7306	10.8265	19	4000	5000	3.74355	4500	24549.7	11.4604	3.41877	4.74655	45.9018	4.7185	19	67.7393
274	North Valiasr	51.3402	35.6507	1.05495	39249	43.5513	12.2331	0.379556	3.335	2.42118	7.27746	4.23826	9	0.166354	34.54	86.1982	2.49204	52.0309	81.2084	134.951	19.9935	12.4294	19	2000	2500	6.86889	1000	37204.5	7.30152	3.94049	5.61543	44.1428	2.46376	59	144.993
275	Shams Abad	51.307	35.6569	0.539513	16233	28.4566	43.0544	0	1.63766	1.12767	4.77655	2.88365	15	0.472971	32.8313	78.5527	2.72584	48.1901	76.2861	124.837	21.0553	10.3631	19	4500	4500	3.95436	4000	30088.2	9.24493	3.2395	3.33888	48.1758	4.83583	5	38.4361
276	Tolid Daru	51.338	35.6636	0.747785	21395	21.6486	11.498	0.318057	5.18386	2.23453	5.65956	14.2705	8	1.06683	33.443	91.0424	2.37675	50.0569	87.0017	137.385	20.2708	11.9435	19	3000	1500	8.17432	1500	28611.2	5.21329	5.03526	5.07128	44.6221	5.06193	14	67.048
277	South Valiasr	51.3451	35.6437	1.38857	31313	35.5889	21.3324	0.305009	2.28486	1.93327	8.33533	2.71294	9	0.529914	35.5206	85.0188	2.47349	51.8739	77.0386	132.519	20.025	12.6787	19	1500	3000	5.74952	1000	22550.5	8.00028	4.22655	5.11609	46.1059	3.80673	47	143.561
278	17Shahrivar	51.2944	35.6691	3.99006	37308	24.4866	77.6661	0	1.64138	0.208814	1.00358	0.187501	15	0.135406	32.2259	73.6168	2.89434	46.6176	73.7016	120.372	21.6445	9.42427	19	4000	5000	6.13227	5000	9350.23	7.49149	4.25031	4.86223	48.7136	4.78182	44	114.856
279	North Khalij Fars	51.2571	35.6706	7.66423	35821	2.19134	8.72191	0	0.360019	0.057638	0	0.280523	20	0.053802	32.5297	80.6877	2.36426	47.1714	69.3907	116.764	20.3381	10.2895	19	1000	8000	2.49802	3000	4673.79	7.83286	4.04737	2.83632	51.3658	6.16398	21	60.1865
280	Aseman	51.3515	35.7782	2.39332	33525	14.4682	2.53595	0.063462	4.1793	1.45046	0	2.8722	15	1.07763	25.9586	66.6224	2.05724	57.4952	54.3492	111.413	21.0044	9.33589	11	3500	1500	4.55767	2000	14007.7	2.08561	5.56422	9.36614	42.6001	3.53468	7	25.7587
281	Dr. Hushyar	51.3511	35.6943	1.04281	36259	24.3921	9.2411	0.409019	4.99051	1.85328	27.9964	1.04269	6	0.942551	34.5143	87.6866	2.88628	67.6806	99.2356	166.477	18.2191	13.8445	18	1000	1000	7.26601	1000	34770.4	5.65288	5.25133	8.75093	41.3531	5.74202	6	21.4316
282	Tohid	51.3705	35.7056	1.31095	39268	34.2345	7.57061	0.292648	15.2653	8.706	2.17839	12.6429	4	1.59604	34.3676	84.9108	2.71238	64.7265	92.2721	156.211	18.8666	13.3143	19	1000	1000	9.25814	1000	29953.9	2.46328	5.66062	11.8824	34.6002	3.83009	14	38.7811
283	Daneshgah Town	51.198	35.7114	5.77519	8391	3.82953	13.7936	0.028447	0.621277	0.171635	0	16.6928	20	0.07262	30.8587	81.0557	1.60588	43.3688	54.1679	97.7794	19.9096	8.97606	18	2000	20000	1.13054	1500	1452.94	3.22378	6.22261	9.51019	33.4761	2.96746	15	151.436
284	Shahrdari Town	51.1816	35.7257	0.32348	2440	12.4499	26.9013	0	1.99817	1.39639	0	20.2271	25	0.065118	31.1411	82.7521	1.67011	43.7362	55.0274	99.0266	19.3976	9.49353	18	1500	20000	3.78262	3500	7542.97	2.07013	8.42377	14.959	21.9794	0.737705	2	79.7852
285	VillaShahr	51.1749	35.7277	1.03416	4252	3.46926	14.372	0	0.89065	0.643398	0	16.1687	25	0.011549	31.2475	83.0576	1.7089	44.0241	55.6935	100.003	19.2995	9.67896	18	2000	20000	2.94848	3500	4111.55	3.54093	6.691	12.6999	34.9398	5.80903	4	87.298
286	Mahmudiyeh	51.4128	35.7956	0.881653	8847	5.52252	0.453707	0.653767	6.78759	1.18119	0	10.686	15	1.64443	33.8377	79.6487	2.63713	60.9281	90.1201	148.709	20.2513	8.25678	16	2500	500	5.33099	3000	10034.5	2.07108	4.98809	16.5932	28.6524	2.99537	19	179.077
287	Darakeh	51.3842	35.8067	0.773478	10589	6.96122	0.733989	0.242505	0.679258	0.218419	4.65351	3.56968	15	4.18689	30.3776	75.3234	2.32727	59.2506	72.1015	130.094	20.2974	9.41281	11	4500	2500	0.986237	1000	13690.1	2.58944	3.64766	8.71659	44.2742	3.05034	8	76.1272
288	Behrood	51.3709	35.797	4.66701	31307	2.81386	0.940935	0.127522	1.16729	0.623569	0	1.70887	15	0.813504	27.7403	70.2944	2.18246	60.6474	64.9563	124.858	20.8093	8.91146	11	5000	2500	0.122753	2000	6708.14	1.17126	5.16745	8.65621	42.8354	3.50081	13	44.8431
289	Hosseinabad - Mobarakabad	51.4793	35.7701	4.06647	63110	1.90018	0.521051	0.195266	4.2703	0.737555	0.176387	1.38913	15	1.01368	32.9476	76.3038	2.44421	55.0385	80.205	134.032	19.317	9.82438	16	1000	1000	5.70027	2000	15519.6	2.33262	4.35977	8.97164	38.3714	3.69989	36	58.0362
290	daryache shohadaye khalij fars	51.2071	35.7385	9.33406	12690	0.92066	3.6625	0.133195	0.099254	0.08691	0	0.338839	25	0.139713	30.8584	83.4357	1.47571	42.9162	52.3074	95.1922	19.4014	8.8121	18	2000	20000	0	3500	1359.54	1.23871	3.98643	3.16785	55.7645	5.92593	7	59.6917
291	Baharan	51.2713	35.7686	2.22162	11559	5.78058	3.06675	0.002286	1.06756	0.357035	0	0.561647	20	0.445775	32.1726	85	1.607	40.915	49.7858	90.3586	15.5665	11.3748	11	5500	4500	0.012704	2000	5202.96	3.56481	6.21211	7.74288	44.5479	5.38974	17	132.386
292	Lavizan - Shiyan - Valiasr	51.5013	35.7776	3.62374	25658	0.232028	0.344745	0.041329	0.528852	0.251557	0.520967	2.98276	15	0.159021	32.4422	73.3588	2.55057	59.1569	83.888	141.528	19.1268	10.766	16	2500	1000	0.208347	500	7080.52	3.52526	3.85461	5.86951	35.7436	3.30111	37	137.024
293	Havanirooz	51.2426	35.7401	3.61595	17084	0.928246	1.11504	0.097537	2.76169	0.042763	0	50.0447	20	0.175919	31.1329	89.9177	1.20735	39.3069	46.2752	85.493	17.634	8.88184	17	2500	8000	1.55712	1000	4724.62	3.59475	3.43973	3.8457	46.1585	7.06509	6	41.7657
294	Qeytariyeh	51.4438	35.7903	1.55273	24509	6.32107	1.6841	0.385127	7.08358	2.1348	3.07476	5.25255	15	1.02567	34.8679	82.2833	2.61495	57.8426	91.755	147.318	20.016	7.6934	16	1000	500	5.9785	3000	15784.5	2.2573	5.03774	14.5008	30.7517	6.31197	34	131.865
295	Kan	51.2783	35.7582	1.5247	18444	20.2016	6.85112	0.046162	2.71903	0.891742	1.75476	1.96997	15	0.315441	32.74	85	1.47891	38.8712	47.5088	86.113	14.0038	11.7459	11	4000	4500	2.06677	1000	12096.8	10.4083	3.22648	6.9833	49.6388	4.7224	11	62.3127
296	Moshiriyeh	51.4778	35.6248	6.10827	72796	15.0354	5.33887	0.039981	2.06978	0.318704	0	1.47438	15	0.447363	27.0551	76.4089	2.16179	46.1348	49.1821	94.4711	22.0268	9.73032	19	1500	1500	1.93304	2500	11917.6	7.44533	3.57775	3.56476	49.8092	3.35183	54	74.3406
297	Koohak	51.2351	35.7264	6.52321	5467	1.19606	3.27454	0.382473	0.124684	0.120351	0	21.365	20	0.409959	29.1486	73.7618	1.13889	41.123	46.2541	87.3721	21.9561	6.4639	18	1500	9000	0.316682	2000	838.08	1.70823	4.6083	4.37169	43.1274	3.6766	9	133.142
298	Hor	51.3882	35.6871	1.19121	16360	32.1179	5.30277	0.615046	6.46991	2.45891	2.66356	10.6244	3	1.37911	35.4117	78.52	2.82405	62.5194	85.9178	146.5	19.3782	13.3034	19	500	1000	6.53288	1500	13734	2.7741	3.63484	6.06968	40.3477	8.11736	21	120.296
299	Sadra	51.2675	35.7276	7.88976	12642	0.710967	0.547857	0.001176	0.164016	0.181666	0	5.59341	15	0.070766	32.618	85	1.26613	38.0008	46.8642	84.7946	14.553	10.5799	18	2000	6500	1.09072	1000	1602.33	3.39281	6.15602	6.162	44.0082	4.0579	1	21.8216
300	Karoon	51.3664	35.6948	0.617286	27588	88.3129	11.1277	0.547535	14.3849	7.86035	42.3013	5.77109	4	2.63169	33.5477	78.8572	2.88474	79.8443	114.457	193.897	17.6401	14.5512	19	1000	1000	8.64938	1500	44692.4	3.34723	5.32	7.63738	45.8829	5.71263	29	102.367
301	Sanaei	51.4211	35.7214	1.29026	13476	35.7066	15.4908	0.612006	19.946	12.7425	0	0.41821	4	4.36593	40.645	84.8182	2.83674	48.6394	59.2948	106.503	21.2986	15.8996	19	1000	1000	10.7652	500	10444.4	2.39516	7.16083	16.3476	32.7668	5.11279	26	171.31
302	Vanak	51.3921	35.7641	2.3265	20203	11.5653	2.23335	0.266344	3.54639	1.82577	3.57644	1.33745	15	0.934936	31.3341	75.8676	2.40611	58.9449	73.0022	130.628	20.648	9.78887	16	2500	1000	4.25931	2500	8683.87	3.95141	5.51039	11.137	36.4395	9.24615	38	173.35
303	Evin	51.3932	35.7987	1.74846	9121	6.81818	1.08522	0.459597	1.90085	0.857613	1.61917	11.2771	15	1.94215	31.0279	75.4663	2.40156	60.1295	75.6637	134.314	20.3209	9.04879	11	4000	1000	3.49602	1500	5216.58	3.3765	3.92819	10.3826	42.6903	10.2511	18	166.905
304	Saheb Zaman	51.4679	35.6737	0.813363	22060	24.0263	4.86499	0.197329	0.849853	1.35735	12.5795	2.59849	7	0.219586	25.8632	85.8376	2.17473	47.7565	63.0298	109.501	18.6472	9.81429	19	1000	500	7.269	500	27122	7.17865	4.50544	6.92656	45.3488	4.4515	6	33.514
305	Ferdos	51.3253	35.6629	1.47483	35042	61.77	12.1531	0.062956	1.41684	1.18326	8.17208	4.57338	9	0.541628	33.196	87.9121	2.4525	49.2557	83.645	133.262	20.4746	11.4353	19	3000	2500	6.8604	2500	23760.1	7.99016	4.35993	5.4135	45.8299	5.00828	15	45.6949
306	Ozgol	51.5112	35.7892	5.20316	37336	0.410379	0.927122	0.000893	0.976837	0.223775	0.15222	7.56498	20	0.105129	32.4003	74.5061	2.52938	58.4189	82.0768	138.922	19.4236	10.6238	16	1000	1000	1.88534	500	7175.64	2.24585	3.65761	4.28809	30.5566	6.80844	18	50.5186
307	Sohanak	51.5303	35.7997	2.22753	28842	0.837609	0.291165	0	0.695975	5e-06	0	12.4675	20	0.101263	32.096	74.6096	2.51478	57.9072	79.7729	136.041	19.6563	10.7055	11	1000	1000	1.07856	2000	12948	1.59025	4.13223	6.81298	41.1658	5.63415	7	29.5321
308	Niru Havaie	51.4743	35.7009	2.96384	26264	14.0297	5.04494	0.061838	4.74677	1.59407	0.073505	0.180918	8	0.654472	27.032	71.0844	2.30052	55.6652	67.775	122.353	21.7254	11.4282	19	1000	1000	1.27707	2000	8861.47	3.42438	4.46088	8.61255	33.4543	4.04356	25	93.368
309	Mahallati	51.5189	35.8046	2.53511	32505	1.19291	0.359786	0	1.04228	0.101279	0	24.6368	20	0.17169	32.4569	75.2527	2.52722	58.7769	82.1842	139.355	19.529	10.6533	11	1000	1000	0.889397	2000	12822	1.11421	4.38281	4.44547	27.9792	3.94093	26	79.8205
310	Pasdaran - Zarabkhaneh	51.4681	35.7726	3.99955	22574	5.12869	0.552516	0.192025	6.37811	1.6804	0	0.907441	15	1.3418	33.2932	80.7212	2.2814	49.3495	74.0592	122.558	19.783	8.52546	16	500	2000	4.3878	3000	5644.13	1.4721	3.13152	11.057	28.9519	3.07433	41	169.031
311	Ferdos	51.3216	35.7207	3.15228	66068	6.42185	5.95661	0.120194	4.26032	1.94772	0	3.33693	10	0.260984	33.3288	89.0161	2.38093	50.4569	69.9487	119.664	18.9009	12.1665	18	1000	1500	4.40488	1500	20958.8	2.36923	5.47078	7.64818	39.348	4.53926	57	85.9046
312	Mehran	51.4571	35.7484	2.15857	29277	8.77919	1.78211	0.206505	5.31014	2.22131	0	0.348773	9	0.878603	34.4887	78.4036	2.54161	54.2213	76.7902	129.696	19.7631	11.0034	17	1000	1000	3.88703	1000	13563.2	1.47284	6.11905	12.1426	35.2238	3.03993	9	35.308
313	Mehran	51.3203	35.7324	1.37153	33889	5.82667	4.60281	0.110469	3.28864	1.72736	0	0.442138	10	0.547178	32.1112	85.681	2.21021	48.1331	61.8167	109.184	18.768	12.2185	17	1000	1500	5.40718	2000	24708.9	1.84674	5.30475	7.39768	38.0735	5.62424	25	74.1344
314	Kuhsar	51.333	35.7818	0.294319	9683	5.63454	2.764	0.060195	2.03782	1.15195	0	4.2125	15	0.547613	28.079	71.892	2.0577	46.5502	46.8139	92.6394	20.055	11.585	11	4500	500	1.13046	2500	32899.7	3.20071	6.075	6.08283	46.0754	10.2138	11	104.933
315	Araj	51.4876	35.7939	1.45338	18896	2.16785	1.20757	0.016334	1.63662	0.801841	0	8.14558	15	1.31283	33.0679	77.9855	2.47885	56.0271	81.1252	135.672	19.6242	9.81027	16	1000	500	4.25179	1500	13001.4	1.43353	5.93975	8.3986	38.6779	4.46655	7	42.87
316	Salamat	51.3834	35.6763	0.48232	15874	54.5733	5.67983	0.41079	2.8891	2.96993	43.3374	8.04339	4	1.07069	34.4168	66.5255	2.93478	56.7915	71.969	127.567	19.1503	11.8977	19	1000	500	8.76486	1000	32911.8	4.25865	4.62705	6.19882	50.7018	7.04926	17	102.32
317	Beryanak	51.3775	35.6751	0.826508	34092	45.0107	5.32211	0.440316	3.1555	2.64424	66.8108	8.58132	5	1.11054	34.5786	72.1258	2.86348	58.3883	78.2549	135.567	19.2529	12.5951	19	500	500	7.44164	1000	41248.3	5.75676	5.30412	7.55016	45.0366	5.78728	31	89.8513
318	Naft Town	51.5056	35.809	2.24863	27780	2.81496	0.764237	0.000123	0.751925	0.603658	0.21091	12.0179	20	0.301125	32.7276	76.9422	2.51439	57.7912	81.6479	137.837	19.6329	10.3747	11	1500	1500	1.07136	2500	12354.2	2.04804	5.55532	7.527	41.8393	3.62491	8	33.7826
319	Eskandari	51.3815	35.6888	0.46362	19174	53.2696	6.10669	0.570613	10.1642	3.62957	58.3471	15.2008	3	1.75409	34.967	79.8419	2.79002	62.8319	87.84	149.285	19.1799	13.341	19	500	500	11.2942	1000	41357.1	4.07307	6.169	7.64577	48.356	7.08251	25	123.053
320	Golha	51.4978	35.8037	0.550657	4940	4.45521	1.68176	0.002059	1.53828	1.15051	0	5.73429	20	0.376249	32.892	77.6429	2.50626	57.149	81.5448	137.119	19.6388	10.1881	11	1500	500	3.20798	2500	8971.11	3.45416	5.06936	11.1134	42.7121	2.93522	7	117.045
321	Mina	51.4518	35.6756	0.472602	19851	12.749	5.03733	0.45033	6.587	2.81467	41.2155	0.017234	6	0.191222	29.7275	86.0133	2.39017	55.2727	74.6927	127.917	19.2057	11.83	19	1000	1000	5.82484	1500	42003.7	5.53117	3.98716	8.0802	40.5946	2.69508	13	67.2013
322	Moniriyeh	51.4017	35.684	0.987579	26847	56.6298	5.99505	0.830197	8.76806	4.80326	26.1365	1.06548	2	1.71962	38.5864	91.0035	2.90127	77.5518	111.307	183.501	19.723	15.7032	19	500	500	7.75703	2500	27184.7	3.41921	3.47826	7.85563	40.2768	11.3309	56	194.978
323	sheykh Hadi	51.402	35.6914	1.59357	30316	65.8392	6.286	1.44691	14.2869	6.27482	2.98323	0.790032	2	3.2864	37.7846	90.3825	2.81432	72.6765	104.232	172.551	19.7886	15.1935	19	1000	500	7.35503	1500	19024	3.56286	4.51544	9.70115	37.0238	4.04077	14	49.1623
324	Emam Sajad	51.3578	35.6548	0.579477	28238	89.4466	23.5257	0.593899	5.96279	5.00455	9.12121	3.00081	7	0.774504	34.8186	82.69	2.59773	54.3303	81.7109	137.234	19.9481	13.3219	19	1500	2000	6.18169	1000	48730.2	8.80165	3.68421	6.68957	44.2671	2.49309	40	135.317
325	Atabak	51.4627	35.6494	1.01574	20469	20.0605	6.33388	0.141334	0.818739	1.03271	33.1766	2.19076	9	0.227932	25.5698	87.3149	2.14398	45.6009	60.2626	104.795	18.3479	9.45936	19	2000	500	3.76717	2500	20151.8	14.9841	3.50232	7.48937	50.3085	4.61185	44	196.825
326	Shokufeh	51.4497	35.6837	0.620647	22237	19.3494	5.92014	0.516452	8.30619	2.98466	30.4197	0	5	0.431437	31.8788	84.8375	2.51157	59.54	80.6671	137.52	19.8022	12.9487	19	500	1000	6.75931	2000	35828.8	3.99058	4.29885	8.2745	41.1941	2.67572	29	123.963
327	South Kiyanshahr	51.4517	35.6335	2.23927	35015	7.89629	10.8014	0.205888	0.683698	0.489581	0	4.28351	10	0.574962	29.7246	81.4216	2.36311	51.0167	66.7865	117.054	20.1103	11.8738	19	500	1500	2.06835	1500	15636.8	9.71929	3.74518	4.16393	51.5891	3.13294	26	74.5676
328	Baq Azari	51.4233	35.6527	2.52923	11221	28.9451	7.19065	0.466559	0.989838	1.31404	9.77779	0.735213	7	0.691675	34.0711	79.4977	2.7064	59.4827	84.9667	142.689	20.0573	15.3887	19	1000	500	3.67295	1000	4436.53	18.1486	3.62384	7.55726	49.6039	4.3579	5	51.8634
329	West Abuzar	51.3586	35.6606	0.448764	18461	81.7094	20.1416	0.56725	7.85601	5.14773	43.3034	5.52467	7	0.992967	34.4843	83.2665	2.60906	55.001	83.9133	139.32	19.8744	13.1574	19	2000	1000	5.84627	1500	41137.4	10.4471	5.29898	7.00937	44.2232	3.4776	35	173.442
330	Abas Abad	51.4683	35.5707	0.213621	7260	1.33904	5.5822	8e-06	0	0.00034	11.7498	2.26671	20	0	31.2706	80.345	2.37882	51.221	65.3823	116.89	20.9003	12.0571	22	4500	3500	0	5500	33985.4	7	3.29585	3.67769	44.4444	5.50964	5	118.939
331	Sartakht	51.4323	35.5892	0.383357	5871	25.9164	4.75448	0.329692	3.44869	1.60029	5.43937	11.2404	15	0.404497	32.5491	80.4477	2.44759	52.5173	70.7674	124.55	20.5046	12.7511	22	1500	2000	4.4495	4000	15314.7	5.53122	3.43127	8.6527	38.2227	5.16096	12	160.507
332	Shikh Saduq	51.4491	35.5969	0.896911	23940	15.7794	7.76735	0.271183	0.444095	0.6763	7.38345	4.8717	15	0.380048	31.5374	80.1648	2.4054	51.5715	66.903	118.839	20.731	12.4156	22	2500	500	4.65092	3000	26691.6	6.91795	4.09587	6.08187	42.5199	4.49039	22	90.3009
333	Abuzar	51.4865	35.6803	1.02816	43110	7.24543	2.5914	0.073399	1.01425	0.391075	0	12.5085	9	0.184765	24.9746	73.101	2.1757	52.3169	62.7007	114.129	21.4187	10.4382	19	1500	1000	6.95628	1500	41929.2	4.5593	4.1558	7.30225	38.071	4.9826	35	80.9777
334	Ashtiyani	51.5059	35.716	0.92588	22552	12.7774	2.20572	0	4.94154	0.889184	0	3.64853	15	0.664338	27.5442	66.8324	2.41995	59.2412	75.0486	133.174	20.7286	11.6268	18	2000	500	8.56051	1000	24357.4	2.8892	5.15228	9.35615	34.9967	1.685	23	99.0764
335	Khani Abad No	51.3849	35.63	0.894221	29988	19.0288	4.4511	0.051931	2.18866	1.26309	0	4.12798	9	0.532866	36.0994	77.6745	2.56563	51.7604	73.4565	129.839	20.3116	15.193	22	2500	3000	5.45732	1000	33535.3	6.41763	3.60686	4.66853	45.0032	3.11791	43	137.225
337	South Shariati	51.3776	35.6209	3.3195	27805	3.747	1.18473	0.00582	0.98003	0.598543	0	0.06119	15	0.230385	38.1737	85.8979	2.24326	48.1961	63.3912	122.336	20.1067	12.5586	22	3000	4000	1.9689	1000	8376.26	9.81693	4.63832	5.29042	44.3433	5.98813	3	17.5902
338	Zaheh Qilani	51.4604	35.6941	0.50942	22840	36.2492	8.43706	0.28966	4.08589	1.35469	52.4053	0.002056	6	0.698296	30.4293	78.5563	2.44788	57.1188	74.2538	129.471	20.5569	12.3484	19	1000	500	6.1484	2500	44835.3	5.10447	5.36517	7.92907	41.6925	6.5324	6	32.5073
339	Sizdah Aban	51.4129	35.6032	2.42915	35284	6.80184	9.03841	0.302021	0.923929	1.00081	0.235925	2.06122	15	0.039312	33.92	79.8684	2.49987	52.9166	73.3893	128.747	20.335	13.5914	22	1000	1000	2.66257	3000	14525.3	10.4818	3.2174	5.19782	49.1384	6.51287	32	89.6664
340	Abshar Tehran	51.2244	35.7601	1.62026	13212	1.55158	0.218035	0	0.143665	0	0	36.733	20	0	31.6045	89.7962	1.52253	41.6563	51.1671	92.5723	17.5341	9.85232	16	5000	9000	1.56139	500	8154.26	1.75709	5.96558	5.28308	48.7113	4.26885	3	33.3017
341	Hakimiyeh	51.5804	35.7358	8.57125	58204	56.4402	37.6189	0.020926	0.892675	0.282814	0	0	20	0.573987	30.473	72.5998	2.49491	57.806	76.3012	132.515	20.1336	11.4569	17	3500	6000	1.32439	1500	6790.61	3.64799	5.57678	5.7728	46.4956	4.26431	31	54.5261
342	Niyavaran	51.4692	35.8176	1.40072	11708	6.41644	1.15046	0.203315	1.32203	2.3345	0.015951	9.68695	20	1.24583	33.2224	79.3771	2.50509	56.8264	81.928	137.056	19.8936	9.5987	11	2500	3000	1.51302	2000	8358.54	2.496	5.90953	13.2815	32.667	4.15101	15	117.573
343	Seyed Khandan	51.4344	35.7508	4.93239	30308	7.85269	2.45484	0.287223	4.9498	2.75117	0	0.208803	8	0.741509	36.1706	81.5777	2.61551	53.1906	74.7355	126.361	20.4104	11.275	17	1000	1000	4.75698	1500	6144.69	1.34461	6.04545	15.293	33.3484	5.02178	28	91.0476
344	Qiyam	51.4417	35.67	0.697698	24412	43.2335	6.6045	0.427849	6.62131	3.16381	37.7575	0	6	0.883212	32.2016	87.5812	2.52157	60.7022	84.1668	142.113	19.4043	13.1323	19	500	500	9.0178	500	34989.4	4.52829	2.7795	6.84909	42.3546	1.44601	13	56.071
345	Ararat	51.4029	35.7767	5.37396	22621	6.12879	1.99207	0.416852	4.04885	1.76373	0.091001	1.8718	15	1.41176	33.0205	78.3906	2.55842	60.3486	83.8498	142.215	20.3977	8.85067	16	3500	1000	3.48528	3500	4209.37	1.2966	4.87763	14.4158	35.0618	8.08099	13	59.9714
346	Majidiyeh	51.4666	35.7356	0.504599	18694	12.3694	2.36575	0.054211	5.01487	0.814379	5.88489	0.27164	8	0.991462	33.6051	72.6927	2.69755	60.2641	82.5133	141.176	19.188	12.6602	18	1000	1000	6.49708	1500	37047.3	4.34173	5.28493	11.2015	43.412	2.84048	23	116.594
347	Heshamtodoleh	51.3885	35.6973	0.477675	12764	50.5352	6.1421	0.958372	17.4183	4.45809	0.466059	13.5307	2	3.1426	35.3734	84.9256	2.65942	60.9942	86.0766	145.263	19.6046	13.3574	19	1000	1000	13.8588	2000	26721.1	2.70604	4.60939	8.92353	45.6303	7.89721	11	84.5868
348	Andisheh	51.2775	35.7469	2.64071	23669	5.17686	3.42402	0.063185	0.716504	0.804323	0	2.82819	15	0.077416	33.8623	85	1.2377	35.5608	44.116	79.548	11.1604	12.27	16	3500	5000	1.64568	1000	8963.12	2.63567	6.37872	5.34454	46.5809	4.20804	6	31.5015
350	Shahid Rajaie	51.3284	35.6338	4.99391	45529	6.97055	13.5494	0.021943	0.289702	0.553215	2.30118	0.068354	15	0.387952	35.2831	85.038	2.43611	50.8318	75.0269	129.781	20.0537	12.0974	19	1000	5000	1.0645	1500	9116.9	12.3199	3.01015	4.73105	45.9499	4.08531	11	27.6248
351	Sorkheh Hesar	51.5502	35.7237	1.38678	1412	17.9447	30.4954	0.016944	2.1848	0.388591	0	0.001645	20	0.191386	29.7646	70.5567	2.4971	58.8005	77.1191	134.421	20.0793	11.6259	18	1000	3000	4.16086	2000	1018.19	2.12604	6.63793	5.80736	49.8998	3.47025	4	141.932
352	siroos	51.4334	35.6722	0.430354	4368	95.8231	9.17185	0.400664	6.82927	3.53926	79.5519	0	5	2.74413	35.7443	91.3449	2.69258	70.0784	100.098	165.929	19.8208	14.9541	19	500	500	5.25478	500	10149.8	13.5723	2.86215	8.21886	54.5732	5.83791	7	125.979

## Sheet: Dictionary
Symbol	Defination
NeighID	Neighborhood identification code
Neighborhood Name	Neighborhood Name
X	Neighbourhood X -coordinate
Y	Neighbourhood Y-coordinate
AREA	Neighbourhood area sq.km
POPULATION	Neighbourhood population
V1	Commercial
V2	Industrial
V3	Social services
V4	Banks
V5	Remedial
V6	Deteriorated buildings
V7	High-rise buildings
V8	Distance from the CBD
V9	Restaurants
V10	Particulate matter PM 2.5 (ug/m3)
V11	Particulate matter PM 10 (ug/m3)
V12	Carbon monoxide (CO ppm)
V13	Nitrogen-dioxide (NO2 ppb)
V14	Nitrogen monoxide (NO ppb)
V15	Nitrogen oxides (NOx ppb) (NO+NO2)
V16	Ozone (O3 ppb)
V17	Sulphur-oxide (SO2 ppb)
V18	Temperature
V19	Metro stations
V20	BRT stations
V21	Density of roads
V22	Fuel stations
V23	Population density
V24	lliteracy rate (%)
V25	Unemployment rate (%)
V26	Elderly rate (%)
V27	Rate of rented homes (%)
V28	Rate of Immigrants (%)
Total deaths	Total COVID-19 deaths
Rate per 100,000 population	COVID-19 smoothed death rate per 100,000 population
