# Supplementary material for: The COVID-19 Mortality Rate Is Associated with Illiteracy, Age, and Air Pollution in Urban Neighborhoods: A Spatiotemporal Cross-Sectional Analysis
Source: Trop Med Infect Dis. 2023 Jan 26;8(2):85. doi: 10.3390/tropicalmed8020085 (PMC9962969; doi:10.3390/tropicalmed8020085)
Supplement: Supplementary file 1 [file tropicalmed-08-00085-s001.zip › Supplementary ‎ File S2.txt]

                                 _____________________________

                                        SaTScan v10.0.2
                                 _____________________________


Program run on: Wed Feb 16 19:31:45 2022

Retrospective Purely Temporal analysis
scanning for clusters with high rates
using the Discrete Poisson model.
_______________________________________________________________________________________________

SUMMARY OF DATA

Study period.......................: 0 to 20
Population, averaged over time.....: 9019010
Total number of cases..............: 7043
Annual cases / 100000..............: 1357.4
_______________________________________________________________________________________________

CLUSTERS DETECTED

1.Location IDs included.: All
  Time frame............: 3 to 12
  Number of cases.......: 4699
  Expected cases........: 3351.90
  Annual cases / 100000.: 1903.0
  Observed / expected...: 1.40
  Relative risk.........: 2.21
  Log likelihood ratio..: 523.450678
  Monte Carlo rank......: 1/1000
  P-value...............: 0.001

A cluster is statistically significant when its log likelihood ratio is greater than the
critical value, which is, for significance level:

Gumbel Critical Values:
... 0.00001: 13.291555
.... 0.0001: 11.043192

Standard Monte Carlo Critical Values:
..... 0.001: 9.991127
...... 0.01: 6.810781
...... 0.05: 5.149963
_______________________________________________________________________________________________

PARAMETER SETTINGS

Input
-----
  Case File       : E:\COVID-Tehran\ScanSt\Deaths\Cases.cas
  Population File : E:\COVID-Tehran\ScanSt\Deaths\Population.pop
  Time Precision  : Generic
  Start Time      : 0
  End Time        : 20

Analysis
--------
  Type of Analysis        : Retrospective Purely Temporal
  Probability Model       : Discrete Poisson
  Scan for Areas with     : High Rates
  Time Aggregation Units  : Generic
  Time Aggregation Length : 1

Output
------
  Main Results File       : E:\COVID-Tehran\ScanSt\Deaths\Temporal.txt
  Cluster File            : E:\COVID-Tehran\ScanSt\Deaths\Temporal.col.txt
  Cluster File            : E:\COVID-Tehran\ScanSt\Deaths\Temporal.col.dbf
  Stratified Cluster File : E:\COVID-Tehran\ScanSt\Deaths\Temporal.sci.txt
  Stratified Cluster File : E:\COVID-Tehran\ScanSt\Deaths\Temporal.sci.dbf
  Location File           : E:\COVID-Tehran\ScanSt\Deaths\Temporal.gis.txt
  Location File           : E:\COVID-Tehran\ScanSt\Deaths\Temporal.gis.dbf
  Simulated LLRs File     : E:\COVID-Tehran\ScanSt\Deaths\Temporal.llr.txt
  Simulated LLRs File     : E:\COVID-Tehran\ScanSt\Deaths\Temporal.llr.dbf
  Temporal Graph File     : E:\COVID-Tehran\ScanSt\Deaths\Temporal.temporal.html

Data Checking
-------------
  Temporal Data Check : Check to ensure that all cases and controls are within the specified temporal study period.

Temporal Window
---------------
  Minimum Temporal Cluster Size : 1 Generic
  Maximum Temporal Cluster Size : 50 percent of study period

Cluster Restrictions
--------------------
  Minimum Cases in Cluster for High Rates : 5
  Restrict High Rate Clusters             : No

Space And Time Adjustments
--------------------------
  Temporal Adjustment                     : None
  Adjust for Weekly Trends, Nonparametric : No
  Adjust for known relative risks         : No

Inference
---------
  P-Value Reporting                  : Default Combination
  Number of Replications             : 999
  Adjusting for More Likely Clusters : No

Temporal Graphs
---------------
  Produce Temporal Graphs : Yes
  Cluster Graphing        : Most likely cluster only
  Temporal Graph File     : E:\COVID-Tehran\ScanSt\Deaths\Temporal.temporal.html

Other Output
------------
  Report Critical Values     : Yes
  Report Monte Carlo Rank    : Yes
  Print ASCII Column Headers : Yes

Run Options
-----------
  Processor Usage   : All Available Processors
  Suppress Warnings : No
  Logging Analysis  : No
_______________________________________________________________________________________________

Program completed  : Wed Feb 16 19:31:45 2022
Total Running Time : 0 seconds
Processor Usage    : 8 processors
