# Supplementary material for: The COVID-19 Mortality Rate Is Associated with Illiteracy, Age, and Air Pollution in Urban Neighborhoods: A Spatiotemporal Cross-Sectional Analysis
Source: Trop Med Infect Dis. 2023 Jan 26;8(2):85. doi: 10.3390/tropicalmed8020085 (PMC9962969; doi:10.3390/tropicalmed8020085)
Supplement: Supplementary file 1 [file tropicalmed-08-00085-s001.zip › Supplementary ‎ File S3.txt]

                                 _____________________________

                                        SaTScan v10.0.2
                                 _____________________________


Program run on: Wed Feb 16 19:33:42 2022

Purely Spatial analysis
scanning for clusters with high rates
using the Discrete Poisson model.
_______________________________________________________________________________________________

SUMMARY OF DATA

Study period.......................: 0 to 20
Number of locations................: 350
Population, averaged over time.....: 9019010
Total number of cases..............: 7043
Annual cases / 100000..............: 1357.4
_______________________________________________________________________________________________

CLUSTERS DETECTED

1.Location IDs included.: 99, 100, 105, 101, 192, 119, 98, 201, 191, 322, 102, 120, 200, 316,
                          165, 126, 143, 298, 323, 202, 317, 352, 328, 319, 269, 142, 189, 94,
                          96, 207, 183, 347, 164, 166, 344, 104, 140, 208, 121, 177, 205, 127,
                          95, 141, 163, 226, 161, 210, 223, 103, 209, 259, 184, 329, 97, 206,
                          300, 224, 118, 169, 152, 321, 326, 130, 158, 271, 258, 324, 151, 146,
                          129
  Coordinates / radius..: (35.671100 N, 51.403600 E) / 4.63 km
  Population............: 1551335
  Number of cases.......: 1956
  Expected cases........: 1210.76
  Annual cases / 100000.: 2192.9
  Observed / expected...: 1.62
  Relative risk.........: 1.85
  Log likelihood ratio..: 242.779994
  Monte Carlo rank......: 1/1000
  P-value...............: < 0.00000000000000001

2.Location IDs included.: 19
  Coordinates / radius..: (35.723200 N, 51.357100 E) / 0 km
  Population............: 27371
  Number of cases.......: 66
  Expected cases........: 21.36
  Annual cases / 100000.: 4193.9
  Observed / expected...: 3.09
  Relative risk.........: 3.11
  Log likelihood ratio..: 29.954894
  Monte Carlo rank......: 1/1000
  P-value...............: 0.00000000027

3.Location IDs included.: 345, 27, 302, 28, 286, 7, 44, 303, 263, 25, 261, 4, 26, 12
  Coordinates / radius..: (35.776700 N, 51.402900 E) / 3.17 km
  Population............: 374205
  Number of cases.......: 421
  Expected cases........: 292.05
  Annual cases / 100000.: 1956.7
  Observed / expected...: 1.44
  Relative risk.........: 1.47
  Log likelihood ratio..: 26.251798
  Monte Carlo rank......: 1/1000
  P-value...............: 0.0000000074

4.Location IDs included.: 144
  Coordinates / radius..: (35.695400 N, 51.486500 E) / 0 km
  Population............: 20374
  Number of cases.......: 47
  Expected cases........: 15.90
  Annual cases / 100000.: 4012.2
  Observed / expected...: 2.96
  Relative risk.........: 2.97
  Log likelihood ratio..: 19.906656
  Monte Carlo rank......: 1/1000
  P-value...............: 0.0000021

5.Location IDs included.: 174
  Coordinates / radius..: (35.726200 N, 51.520600 E) / 0 km
  Population............: 56873
  Number of cases.......: 87
  Expected cases........: 44.39
  Annual cases / 100000.: 2660.6
  Observed / expected...: 1.96
  Relative risk.........: 1.97
  Log likelihood ratio..: 16.064477
  Monte Carlo rank......: 1/1000
  P-value...............: 0.000065

6.Location IDs included.: 310
  Coordinates / radius..: (35.772600 N, 51.468100 E) / 0 km
  Population............: 22574
  Number of cases.......: 41
  Expected cases........: 17.62
  Annual cases / 100000.: 3158.9
  Observed / expected...: 2.33
  Relative risk.........: 2.33
  Log likelihood ratio..: 11.287448
  Monte Carlo rank......: 3/1000
  P-value...............: 0.0045

7.Location IDs included.: 181, 194
  Coordinates / radius..: (35.702800 N, 51.228200 E) / 2.05 km
  Population............: 18598
  Number of cases.......: 34
  Expected cases........: 14.52
  Annual cases / 100000.: 3179.6
  Observed / expected...: 2.34
  Relative risk.........: 2.35
  Log likelihood ratio..: 9.482041
  Monte Carlo rank......: 25/1000
  P-value...............: 0.025

8.Location IDs included.: 292
  Coordinates / radius..: (35.777600 N, 51.501300 E) / 0 km
  Population............: 25658
  Number of cases.......: 37
  Expected cases........: 20.03
  Annual cases / 100000.: 2508.1
  Observed / expected...: 1.85
  Relative risk.........: 1.85
  Log likelihood ratio..: 5.761098
  Monte Carlo rank......: 462/1000
  P-value...............: 0.462

9.Location IDs included.: 294
  Coordinates / radius..: (35.790300 N, 51.443800 E) / 0 km
  Population............: 24509
  Number of cases.......: 34
  Expected cases........: 19.13
  Annual cases / 100000.: 2412.8
  Observed / expected...: 1.78
  Relative risk.........: 1.78
  Log likelihood ratio..: 4.700534
  Monte Carlo rank......: 801/1000
  P-value...............: 0.801

10.Location IDs included.: 37
   Coordinates / radius..: (35.736200 N, 51.504600 E) / 0 km
   Population............: 29582
   Number of cases.......: 37
   Expected cases........: 23.09
   Annual cases / 100000.: 2175.4
   Observed / expected...: 1.60
   Relative risk.........: 1.61
   Log likelihood ratio..: 3.551399
   Monte Carlo rank......: 990/1000
   P-value...............: 0.990

11.Location IDs included.: 57
   Coordinates / radius..: (35.717700 N, 51.490900 E) / 0 km
   Population............: 30311
   Number of cases.......: 37
   Expected cases........: 23.66
   Annual cases / 100000.: 2123.1
   Observed / expected...: 1.56
   Relative risk.........: 1.57
   Log likelihood ratio..: 3.218500
   Monte Carlo rank......: 999/1000
   P-value...............: 0.999

12.Location IDs included.: 13
   Coordinates / radius..: (35.789500 N, 51.344400 E) / 0 km
   Population............: 15882
   Number of cases.......: 22
   Expected cases........: 12.40
   Annual cases / 100000.: 2409.2
   Observed / expected...: 1.77
   Relative risk.........: 1.78
   Log likelihood ratio..: 3.023814
   Monte Carlo rank......: 999/1000
   P-value...............: 0.999

13.Location IDs included.: 291
   Coordinates / radius..: (35.768600 N, 51.271300 E) / 0 km
   Population............: 11559
   Number of cases.......: 17
   Expected cases........: 9.02
   Annual cases / 100000.: 2557.9
   Observed / expected...: 1.88
   Relative risk.........: 1.89
   Log likelihood ratio..: 2.797393
   Monte Carlo rank......: 999/1000
   P-value...............: 0.999

A cluster is statistically significant when its log likelihood ratio is greater than the
critical value, which is, for significance level:

Gumbel Critical Values:
... 0.00001: 18.159064
.... 0.0001: 15.572682

Standard Monte Carlo Critical Values:
..... 0.001: 12.545047
...... 0.01: 10.568609
...... 0.05: 8.628534
_______________________________________________________________________________________________

PARAMETER SETTINGS

Input
-----
  Case File        : E:\COVID-Tehran\ScanSt\Deaths\Cases.cas
  Population File  : E:\COVID-Tehran\ScanSt\Deaths\Population.pop
  Time Precision   : Generic
  Start Time       : 0
  End Time         : 20
  Coordinates File : E:\COVID-Tehran\ScanSt\Deaths\Coordinates.geo
  Coordinates      : Latitude/Longitude

Analysis
--------
  Type of Analysis    : Purely Spatial
  Probability Model   : Discrete Poisson
  Scan for Areas with : High Rates

Output
------
  Main Results File       : E:\COVID-Tehran\ScanSt\Deaths\Spatial.txt
  Cluster File            : E:\COVID-Tehran\ScanSt\Deaths\Spatial.col.txt
  Google Maps File        : E:\COVID-Tehran\ScanSt\Deaths\Spatial.clustermap.html
  Shapefile (Cluster)     : E:\COVID-Tehran\ScanSt\Deaths\Spatial.clustermap.col.shp
  Cluster File            : E:\COVID-Tehran\ScanSt\Deaths\Spatial.clustermap.col.dbf
  Stratified Cluster File : E:\COVID-Tehran\ScanSt\Deaths\Spatial.clustermap.sci.txt
  Stratified Cluster File : E:\COVID-Tehran\ScanSt\Deaths\Spatial.clustermap.sci.dbf
  Location File           : E:\COVID-Tehran\ScanSt\Deaths\Spatial.clustermap.gis.txt
  Location File           : E:\COVID-Tehran\ScanSt\Deaths\Spatial.clustermap.gis.dbf
  Shapefile (Locations)   : E:\COVID-Tehran\ScanSt\Deaths\Spatial.clustermap.gis.shp
  Risk Estimates File     : E:\COVID-Tehran\ScanSt\Deaths\Spatial.clustermap.rr.txt
  Risk Estimates File     : E:\COVID-Tehran\ScanSt\Deaths\Spatial.clustermap.rr.dbf
  Simulated LLRs File     : E:\COVID-Tehran\ScanSt\Deaths\Spatial.clustermap.llr.txt
  Simulated LLRs File     : E:\COVID-Tehran\ScanSt\Deaths\Spatial.clustermap.llr.dbf

Data Checking
-------------
  Temporal Data Check     : Check to ensure that all cases and controls are within the specified temporal study period.
  Geographical Data Check : Check to ensure that all observations (cases, controls and populations) are within the specified geographical area.

Spatial Neighbors
-----------------
  Use Non-Euclidean Neighbors file : No
  Use Meta Locations File          : No
  Multiple Coordinates Type        : Allow only one set of coordinates per location ID.

Locations Network
-----------------
  Use Locations Network File : No
  Locations Network File     : 
  Locations Network Purpose  : Network Definition

Spatial Window
--------------
  Maximum Spatial Cluster Size : 50 percent of population at risk
  Window Shape                 : Circular
  Isotonic Scan                : No

Cluster Restrictions
--------------------
  Minimum Cases in Cluster for High Rates : 5
  Restrict High Rate Clusters             : No

Space And Time Adjustments
--------------------------
  Adjust for known relative risks : No

Inference
---------
  P-Value Reporting                  : Default Combination
  Number of Replications             : 999
  Adjusting for More Likely Clusters : No

Cluster Drilldown
-----------------
  Standard Drilldown on Detected Clusters : No

Miscellaneous Analysis
----------------------
  Report Oliveira's F : No

Spatial Output
--------------
  Automatically Launch Map                  : Yes
  Report Hierarchical Clusters              : Yes
  Criteria for Reporting Secondary Clusters : No Geographical Overlap
  Report Gini Optimized Cluster Collection  : No
  Restrict Reporting to Smaller Clusters    : No

Other Output
------------
  Report Critical Values     : Yes
  Report Monte Carlo Rank    : Yes
  Print ASCII Column Headers : Yes

Run Options
-----------
  Processor Usage   : All Available Processors
  Suppress Warnings : No
  Logging Analysis  : No
_______________________________________________________________________________________________

Program completed  : Wed Feb 16 19:33:42 2022
Total Running Time : 0 seconds
Processor Usage    : 8 processors
