# Supplementary material for: The COVID-19 Mortality Rate Is Associated with Illiteracy, Age, and Air Pollution in Urban Neighborhoods: A Spatiotemporal Cross-Sectional Analysis
Source: Trop Med Infect Dis. 2023 Jan 26;8(2):85. doi: 10.3390/tropicalmed8020085 (PMC9962969; doi:10.3390/tropicalmed8020085)
Supplement: Supplementary file 1 [file tropicalmed-08-00085-s001.zip › Supplementary ‎ File S4.txt]

                                 _____________________________

                                        SaTScan v10.0.2
                                 _____________________________


Program run on: Wed Feb 16 19:34:33 2022

Retrospective Space-Time analysis
scanning for clusters with high rates
using the Discrete Poisson model.
_______________________________________________________________________________________________

SUMMARY OF DATA

Study period.......................: 0 to 20
Number of locations................: 350
Population, averaged over time.....: 9019010
Total number of cases..............: 7043
Annual cases / 100000..............: 1357.4
_______________________________________________________________________________________________

CLUSTERS DETECTED

1.Location IDs included.: 158, 161, 162, 163, 159, 118, 328, 160, 327, 121, 127, 129, 164, 199,
                          198, 147, 81, 166, 126, 152, 149, 325, 197, 148, 119, 165, 138, 151,
                          344, 98, 156, 150, 352, 133, 120, 216, 105, 217, 169, 339, 80, 335,
                          141, 99, 153, 191, 296, 213, 192, 321, 142, 177, 117, 215, 168, 100,
                          332, 143, 200, 244, 337, 201, 146, 304, 101, 145, 124, 331, 326, 154,
                          202, 183, 219, 232, 226, 125, 322, 184, 185, 102, 212, 135, 218, 253,
                          210, 122, 137, 316, 128, 207, 123, 208, 136, 269, 140, 317, 130, 131,
                          170, 221, 220, 167, 323, 155, 271, 176, 298, 178, 338, 324, 211, 96,
                          333, 329, 209, 196, 214, 186, 205, 267, 189, 319, 94, 74, 69, 171,
                          203, 347, 179, 277, 95, 68, 206, 204, 259, 258, 104, 233, 223, 308,
                          15, 139, 144, 330, 76, 134, 103, 97, 274
  Coordinates / radius..: (35.637700 N, 51.430600 E) / 8.29 km
  Time frame............: 3 to 11
  Population............: 3567042
  Number of cases.......: 2244
  Expected cases........: 1193.12
  Annual cases / 100000.: 2553.0
  Observed / expected...: 1.88
  Relative risk.........: 2.29
  Log likelihood ratio..: 467.316532
  Monte Carlo rank......: 1/1000
  P-value...............: < 0.00000000000000001

A cluster is statistically significant when its log likelihood ratio is greater than the
critical value, which is, for significance level:

Gumbel Critical Values:
... 0.00001: 23.274220
.... 0.0001: 20.542639

Standard Monte Carlo Critical Values:
..... 0.001: 16.725759
...... 0.01: 15.471707
...... 0.05: 13.162413
_______________________________________________________________________________________________

PARAMETER SETTINGS

Input
-----
  Case File        : E:\COVID-Tehran\ScanSt\Deaths\Cases.cas
  Population File  : E:\COVID-Tehran\ScanSt\Deaths\Population.pop
  Time Precision   : Generic
  Start Time       : 0
  End Time         : 20
  Coordinates File : E:\COVID-Tehran\ScanSt\Deaths\Coordinates.geo
  Coordinates      : Latitude/Longitude

Analysis
--------
  Type of Analysis        : Retrospective Space-Time
  Probability Model       : Discrete Poisson
  Scan for Areas with     : High Rates
  Time Aggregation Units  : Generic
  Time Aggregation Length : 1

Output
------
  Main Results File       : E:\COVID-Tehran\ScanSt\Deaths\SpaceTime.txt
  Cluster File            : E:\COVID-Tehran\ScanSt\Deaths\SpaceTime.col.txt
  Google Maps File        : E:\COVID-Tehran\ScanSt\Deaths\SpaceTime.clustermap.html
  Shapefile (Cluster)     : E:\COVID-Tehran\ScanSt\Deaths\SpaceTime.clustermap.col.shp
  Cluster File            : E:\COVID-Tehran\ScanSt\Deaths\SpaceTime.clustermap.col.dbf
  Stratified Cluster File : E:\COVID-Tehran\ScanSt\Deaths\SpaceTime.clustermap.sci.txt
  Stratified Cluster File : E:\COVID-Tehran\ScanSt\Deaths\SpaceTime.clustermap.sci.dbf
  Location File           : E:\COVID-Tehran\ScanSt\Deaths\SpaceTime.clustermap.gis.txt
  Location File           : E:\COVID-Tehran\ScanSt\Deaths\SpaceTime.clustermap.gis.dbf
  Shapefile (Locations)   : E:\COVID-Tehran\ScanSt\Deaths\SpaceTime.clustermap.gis.shp
  Risk Estimates File     : E:\COVID-Tehran\ScanSt\Deaths\SpaceTime.clustermap.rr.txt
  Risk Estimates File     : E:\COVID-Tehran\ScanSt\Deaths\SpaceTime.clustermap.rr.dbf
  Simulated LLRs File     : E:\COVID-Tehran\ScanSt\Deaths\SpaceTime.clustermap.llr.txt
  Simulated LLRs File     : E:\COVID-Tehran\ScanSt\Deaths\SpaceTime.clustermap.llr.dbf
  Temporal Graph File     : E:\COVID-Tehran\ScanSt\Deaths\SpaceTime.temporal.html

Data Checking
-------------
  Temporal Data Check     : Check to ensure that all cases and controls are within the specified temporal study period.
  Geographical Data Check : Check to ensure that all observations (cases, controls and populations) are within the specified geographical area.

Spatial Neighbors
-----------------
  Use Non-Euclidean Neighbors file : No
  Use Meta Locations File          : No
  Multiple Coordinates Type        : Allow only one set of coordinates per location ID.

Locations Network
-----------------
  Use Locations Network File : No
  Locations Network File     : 
  Locations Network Purpose  : Network Definition

Spatial Window
--------------
  Maximum Spatial Cluster Size     : 50 percent of population at risk
  Include Purely Temporal Clusters : No
  Window Shape                     : Circular

Temporal Window
---------------
  Minimum Temporal Cluster Size   : 1 Generic
  Maximum Temporal Cluster Size   : 50 percent of study period
  Include Purely Spatial Clusters : No

Cluster Restrictions
--------------------
  Minimum Cases in Cluster for High Rates : 5
  Restrict High Rate Clusters             : No

Space And Time Adjustments
--------------------------
  Temporal Adjustment                     : None
  Adjust for Weekly Trends, Nonparametric : No
  Spatial Adjustment                      : None
  Adjust for known relative risks         : No

Inference
---------
  P-Value Reporting                  : Default Combination
  Number of Replications             : 999
  Adjusting for More Likely Clusters : No

Cluster Drilldown
-----------------
  Standard Drilldown on Detected Clusters  : No
  Bernoulli Drilldown on Detected Clusters : No

Spatial Output
--------------
  Automatically Launch Map                  : Yes
  Report Hierarchical Clusters              : Yes
  Criteria for Reporting Secondary Clusters : No Geographical Overlap
  Restrict Reporting to Smaller Clusters    : No

Temporal Graphs
---------------
  Produce Temporal Graphs : Yes
  Cluster Graphing        : Most likely cluster only
  Temporal Graph File     : E:\COVID-Tehran\ScanSt\Deaths\SpaceTime.temporal.html

Other Output
------------
  Report Critical Values     : Yes
  Report Monte Carlo Rank    : Yes
  Print ASCII Column Headers : Yes

Run Options
-----------
  Processor Usage   : All Available Processors
  Suppress Warnings : No
  Logging Analysis  : No
_______________________________________________________________________________________________

Program completed  : Wed Feb 16 19:34:40 2022
Total Running Time : 7 seconds
Processor Usage    : 8 processors
