# Supplementary material for: The COVID-19 Mortality Rate Is Associated with Illiteracy, Age, and Air Pollution in Urban Neighborhoods: A Spatiotemporal Cross-Sectional Analysis
Source: Trop Med Infect Dis. 2023 Jan 26;8(2):85. doi: 10.3390/tropicalmed8020085 (PMC9962969; doi:10.3390/tropicalmed8020085)
Supplement: Supplementary file 1 [file tropicalmed-08-00085-s001.zip › Supplementary ‎ File S6.xlsx]

## Sheet: Variables used
Criteria	Sub-criteria	Symbol	Description		Pearson's R	R^2	Status	Min	Max	Ave	SD
Built-environment, Landuse and Facilities	V1: Commercial	V1	Spatial density of commercial units (number per square kilometer)		0.5	0.25	Excluded by Exploratory Regression	1 <	155.33	22.01	23.1
Built-environment, Landuse and Facilities	V2: Industrial	V2	Spatial density of industrial units per square kilometer		0.16	0.03	Excluded by Exploratory Regression	1 <	77.67	7.25	8.6
Built-environment, Landuse and Facilities	V3: Social services	V3	Spatial density of social services units per square kilometer		0.47	0.22	Excluded by Exploratory Regression	1 <	1.95	0.26	0.32
Built-environment, Landuse and Facilities	V4: Banks	V4	Spatial density of Banks per per square kilometer		0.16	0.02	Excluded by Exploratory Regression	1 <	23.15	4.57	4.73
Built-environment, Landuse and Facilities	V5: Remedial	V5	Spatial density of remedial and health centers(Hospitals for patients with Covid 19, public clinics and laboratories) per square kilometer		0.22	0.05	Excluded by Exploratory Regression	1 <	13.21	2.04	2
Built-environment, Landuse and Facilities	V6: Deteriorated buildings	V6	Ratio of area of deteriorated and old buildings in each neighborhood (area of blocks with most old and deteriorated buildings in square kilometer/total area of each neighbourhood * 100, (%)		0.46	0.21	Excluded by Exploratory Regression	1 <	86.13	12.14	20.47
Built-environment, Landuse and Facilities	V7: High-rise buildings	V7	Spatial density of residential high-rise buildings per square kilometer		-0.07	0	Excluded by Pearson correlation	1 <	50.04	4.48	5.85
Built-environment, Landuse and Facilities	C8: Distance from the CBD	V8	Distance to the city center (km)	Values are weighted invertically (values from 1 to 9)	0.25	0.06	Excluded by Exploratory Regression	1	9	3.27	1.75
Built-environment, Landuse and Facilities	V9: Restaurants	V9	Spatial density of resturants per square kilometer		0.5	0.25	Excluded by Exploratory Regression	1 <	9.68	1	1.22
Air Quality Indicators	V10: Particulate matter PM 2.5 (ug/m3)	V10	Concentration ‎ of particles less than 2.5 micrometers in diameter (PM2.5) per one cubic metre of air [µg/m3]		0.16	0.02	Excluded by Exploratory Regression	22.08	42.74	32.54	3.48
Air Quality Indicators	V11: Particulate matter PM 10 (ug/m3)	V11	Concentration ‎ of particles less than 10 micrometers in diameter (PM10) per one cubic metre of air [µg/m3]		0.06	0	Included in OLS, GWR and MGWR models	56.47	101.41	80.3	7.63
Air Quality Indicators	V12: Carbon monoxide (CO ppm)	V12	Concentration ‎ of carbon monoxide (CO) parts per million (ppm)		0.23	0.05	Excluded by Exploratory Regression	1.14	2.97	2.42	0.36
Air Quality Indicators	V13: Nitrogen-dioxide (NO2 ppb)	V13	Concentration ‎ of Nitrogen-dioxide (NO2) parts per billion (ppb)		0.66	0.43	Included in OLS, GWR and MGWR models	35.56	89.53	54.1	8.43
Air Quality Indicators	V14: Nitrogen monoxide (NO ppb)	V14	Concentration ‎ of Nitrogen monoxide (NO) parts per billion (ppb)		0.33	0.11	Excluded by Exploratory Regression	32.35	132.24	73.51	15.79
Air Quality Indicators	V15: Nitrogen oxides (NOx ppb)	V15	Concentration ‎ of Nitrogen oxides (NOx) parts per billion (ppb)		0.22	0.05	Excluded by Exploratory Regression	69.05	217.39	126.97	22.74
Air Quality Indicators	V16: Ozone (O3 ppb)	V16	Concentration ‎ of Ozone (O3) parts per billion (ppb)		0.59	0.34	Included in OLS, GWR and MGWR models	11.16	23.7	19.74	1.44
Air Quality Indicators	V17: Sulphur-oxide (SO2 ppb)	V17	Concentration ‎ of Sulphur-oxide (SO2) parts per billion (ppb)		0.18	0.03	Excluded by Exploratory Regression	6.46	19.63	11.89	2.16
Air Quality Indicators	V18: Temperature	V18	Average Annual Temperature (2011-2021) in degrees celsius		0.17	0.03	Excluded by Exploratory Regression	11	22	17.7	2.7
Public Transportation	V19: Metro stations	V19	Distance to the subway stations in meters (Shorter distance increases the risk of infection)	Values are weighted invertically (values from 1 to 5)	0.17	0.03	Excluded by Exploratory Regression	1	5	3.29	1.14
Public Transportation	V20: BRT stations	V20	Distance to the BRT stations in meters (Shorter distance from the station increases the risk of infection)	Values are weighted invertically (values from 1 to 5)	0.15	0.02	Excluded by Exploratory Regression	1	5	3.66	1.11
Public Transportation	V21: Density of roads	V21	Spatial density of main roads per square kilometer		0.14	0.02	Excluded by Exploratory Regression	1 <	13.86	5.17	2.73
Public Transportation	V22: Fuel stations	V22	Distance to the fuel stations locations in meters (Shorter distance from the station increases the risk of infection)	Values are weighted invertically (values from 1 to 5)	0.05	0	Excluded by Exploratory Regression	1	5	3.01	1.1
Socio-economic characteristics	V23: Population density	V23	Number of people per square kilometer		-0.05	0	Excluded by Pearson correlation	185.9	58970.1	21503.3	12803.9
Socio-economic characteristics	V24: Illiteracy rate (%)	V24	Ratio of illiteracy in the total population ≥ 6 years = illiterate population /population (6+) *100, (%).		0.16	0.03	Included in OLS, GWR and MGWR models	0.7	20.06	5.42	3.9
Socio-economic characteristics	V25: Unemployment rate (%)	V25	Ratio of unemployment in the total population = unemployed population/population (15-65) * 100, (%).		-0.18	0.03	Excluded by Pearson correlation	0.05	9.52	4.75	1.13
Socio-economic characteristics	V26: Elderly rate (%)	V26	Ratio of elderly in the total population = elderly (65+) population/total population * 100, (%).		0.61	0.37	Included in OLS, GWR and MGWR models	0.33	21.17	8.02	3.36
Socio-economic characteristics	V27: Rate of rented homes (%)	V27	Total number of rented houses/total number of all types of housing units*100, (%)		-0.02	0	Excluded by Pearson correlation	9.81	68.27	41.92	7.34
Socio-economic characteristics	V28: Rate of Immigrants (%)	V28	Ratio of immigrants in the total population = immigrants population/total population * 100, (%).		-0.01	0	Excluded by Pearson correlation	0.62	36.24	5.27	3.43
