# Supplementary material for: The COVID-19 Mortality Rate Is Associated with Illiteracy, Age, and Air Pollution in Urban Neighborhoods: A Spatiotemporal Cross-Sectional Analysis
Source: Trop Med Infect Dis. 2023 Jan 26;8(2):85. doi: 10.3390/tropicalmed8020085 (PMC9962969; doi:10.3390/tropicalmed8020085)
Supplement: Supplementary file 1 [file tropicalmed-08-00085-s001.zip › Supplementary ‎ File S7.txt]

******************************************************************************
Choose 1 of 5 Summary
  Highest Adjusted R-Squared Results  
AdjR2    AICc   JB K(BP)  VIF   SA   Model  
 0.43 3543.17 0.00  0.00 1.00 0.00  +V13N***
 0.37 3579.97 0.00  0.00 1.00 0.00  +V26N***
 0.34 3594.02 0.00  0.00 1.00 0.00  +V16N***
       Passing Models       
AdjR2 AICc JB K(BP) VIF SA   Model
******************************************************************************
Choose 2 of 5 Summary
       Highest Adjusted R-Squared Results       
AdjR2    AICc   JB K(BP)  VIF   SA   Model            
 0.49 3506.50 0.00  0.12 1.54 0.00  +V13N***  +V16N***
 0.48 3513.85 0.00  0.00 1.31 0.00  +V16N***  +V26N***
 0.48 3515.64 0.00  0.00 1.90 0.00  +V13N***  +V26N***
       Passing Models       
AdjR2 AICc JB K(BP) VIF SA   Model
******************************************************************************
Choose 3 of 5 Summary
            Highest Adjusted R-Squared Results            
AdjR2    AICc   JB K(BP)  VIF   SA   Model                      
 0.52 3484.31 0.00  0.02 2.28 0.00  +V13N***  +V16N***  +V26N***
 0.52 3484.81 0.00  0.09 1.56 0.00  +V11N***  +V13N***  +V16N***
 0.52 3486.84 0.00  0.02 1.40 0.00  +V16N***  +V24N***  +V26N***
       Passing Models       
AdjR2 AICc JB K(BP) VIF SA   Model
******************************************************************************
Choose 4 of 5 Summary
                 Highest Adjusted R-Squared Results                 
AdjR2    AICc   JB K(BP)  VIF   SA   Model                                
 0.55 3467.07 0.00  0.02 2.35 0.00  +V11N***  +V13N***  +V16N***  +V26N***
 0.54 3469.49 0.00  0.08 2.48 0.00  +V13N***  +V16N***  +V24N***  +V26N***
 0.53 3480.45 0.00  0.01 1.41 0.00  +V11N***  +V16N***  +V24N***  +V26N***
       Passing Models       
AdjR2 AICc JB K(BP) VIF SA   Model
******************************************************************************
Choose 5 of 5 Summary
                      Highest Adjusted R-Squared Results                      
AdjR2    AICc   JB K(BP)  VIF   SA   Model                                          
 0.56 3455.82 0.00  0.04 2.58 0.00  +V11N***  +V13N***  +V16N***  +V24N***  +V26N***
       Passing Models       
AdjR2 AICc JB K(BP) VIF SA   Model
******************************************************************************
************** Exploratory Regression Global Summary (TOTALEBS) **************

              Percentage of Search Criteria Passed             
Search Criterion                    Cutoff Trials # Passed % Passed
Min Adjusted R-Squared              > 0.50     31       10    32.26
Max Coefficient p-value             < 0.05     31       22    70.97
Max VIF Value                       < 7.50     31       31   100.00
Min Jarque-Bera p-value             > 0.10     31        0     0.00
Min Spatial Autocorrelation p-value > 0.10     14        0     0.00

------------------------------------------------------------------------------

     Summary of Variable Significance    
Variable % Significant % Negative % Positive
V13N            100.00       0.00     100.00
V14N            100.00       0.00     100.00
V26N            100.00       0.00     100.00
V11N             75.00       0.00     100.00
V24N             68.75       0.00     100.00

------------------------------------------------------------------------------

  Summary of Multicollinearity  
Variable  VIF Violations Covariates
V11N     1.07          0 --------  
V13N     2.58          0 --------  
V16N     1.59          0 --------  
V24N     1.20          0 --------  
V26N     2.31          0 --------  

------------------------------------------------------------------------------

             Summary of Residual Normality (JB)             
      JB    AdjR2        AICc    K(BP)      VIF       SA   Model  
0.000000 0.342019 3594.023592 0.004665 1.000000 0.000000  +V16N***
0.000000 0.431002 3543.168444 0.002584 1.000000 0.000000  +V13N***
0.000000 0.000786 3740.250902 0.023761 1.000000 0.000068  +V11N   

------------------------------------------------------------------------------

                     Summary of Residual Spatial Autocorrelation (SA)                     
      SA    AdjR2        AICc       JB    K(BP)      VIF   Model                                
0.000173 0.528600 3480.454074 0.000000 0.013016 1.408572  +V11N***  +V16N***  +V24N***  +V26N***
0.000081 0.518463 3486.843578 0.000000 0.022103 1.402638  +V16N***  +V24N***  +V26N***          
0.000068 0.000786 3740.250902 0.000000 0.023761 1.000000  +V11N                                 

------------------------------------------------------------------------------
                    Table Abbreviations                     
AdjR2 Adjusted R-Squared                                     
AICc  Akaike's Information Criterion                         
JB    Jarque-Bera p-value                                    
K(BP) Koenker (BP) Statistic p-value                         
VIF   Max Variance Inflation Factor                          
SA    Global Moran's I p-value                               
Model Variable sign (+/-)                                    
Model Variable significance (* = 0.10; ** = 0.05; *** = 0.01)
------------------------------------------------------------------------------
