# Supplementary material for: The COVID-19 Mortality Rate Is Associated with Illiteracy, Age, and Air Pollution in Urban Neighborhoods: A Spatiotemporal Cross-Sectional Analysis
Source: Trop Med Infect Dis. 2023 Jan 26;8(2):85. doi: 10.3390/tropicalmed8020085 (PMC9962969; doi:10.3390/tropicalmed8020085)
Supplement: Supplementary file 1 [file tropicalmed-08-00085-s001.zip › Supplementary ‎ File S10.txt]

================================================================================
MGWR Version: 2.2.1
Released on: 03/20/2020
Source code is available at: https://github.com/pysal/mgwr
Development Team: Ziqi Li, Taylor Oshan, Stewart Fotheringham, Wei Kang, 
Levi Wolf, Hanchen Yu, Mehak Sachdeva, and Sarah Bardin
Spatial Analysis Research Center (SPARC)
Arizona State University, Tempe, USA
================================================================================
Model type:                                                             Gaussian
Number of observations:                                                      350
Number of covariates:                                                          6
Dependent variable:                                                     TotalEBS
Variable standardization:                                                     On
Total runtime:                                                           0:00:00

Global Regression Results
--------------------------------------------------------------------------------
Residual sum of squares:                                                 151.110
Log-likelihood:                                                         -349.642
AIC:                                                                     711.284
AICc:                                                                    713.611
R2:                                                                        0.568
Adj. R2:                                                                   0.562

Variable                                   Est.         SE  t(Est/SE)    p-value
------------------------------------ ---------- ---------- ---------- ----------
Intercept                                 0.000      0.035      0.000      1.000
V11                                       0.146      0.037      3.980      0.000
V13                                       0.297      0.057      5.224      0.000
V16                                       0.268      0.045      5.991      0.000
V24                                       0.142      0.039      3.655      0.000
V26                                       0.303      0.054      5.622      0.000

Geographically Weighted Regression (GWR) Results
--------------------------------------------------------------------------------
Coordinates type:                                                      Projected
Spatial kernel:                                                Adaptive bisquare
Criterion for optimal bandwidth:                                            AICc
Bandwidth used:                                                          172.000

Diagnostic Information
--------------------------------------------------------------------------------
Residual sum of squares:                                                 114.911
Effective number of parameters (trace(S)):                                25.428
Degree of freedom (n - trace(S)):                                        324.572
Sigma estimate:                                                            0.595
Log-likelihood:                                                         -301.718
Degree of Dependency (DoD):                                                0.753
AIC:                                                                     656.293
AICc:                                                                    660.788
BIC:                                                                     758.252
R2:                                                                        0.672
Adj. R2:                                                                   0.646
Adj. alpha (95%):                                                          0.012
Adj. critical t value (95%):                                               2.531

Summary Statistics For GWR Parameter Estimates
--------------------------------------------------------------------------------
Variable                        Mean        STD        Min     Median        Max
--------------------      ---------- ---------- ---------- ---------- ----------
Intercept                     -0.108      0.176     -0.399     -0.125      0.217
V11                            0.118      0.046      0.001      0.124      0.222
V13                           0.332      0.164      0.055      0.340      0.616
V16                           0.319      0.123      0.136      0.318      0.559
V24                           0.139      0.129     -0.074      0.126      0.377
V26                           0.369      0.084      0.195      0.368      0.654
================================================================================
Acknowledgement:
We acknowledge the support of the National Science Foundation under Award 1758786 
from the Geography and Spatial Sciences Program to A. S. Fotheringham which 
enabled this software to be written and made freely available.
================================================================================
