# Supplementary material for: The COVID-19 Mortality Rate Is Associated with Illiteracy, Age, and Air Pollution in Urban Neighborhoods: A Spatiotemporal Cross-Sectional Analysis
Source: Trop Med Infect Dis. 2023 Jan 26;8(2):85. doi: 10.3390/tropicalmed8020085 (PMC9962969; doi:10.3390/tropicalmed8020085)
Supplement: Supplementary file 1 [file tropicalmed-08-00085-s001.zip › Supplementary ‎File S9.txt]

================================================================================
MGWR Version: 2.2.1
Released on: 03/20/2020
Source code is available at: https://github.com/pysal/mgwr
Development Team: Ziqi Li, Taylor Oshan, Stewart Fotheringham, Wei Kang, 
Levi Wolf, Hanchen Yu, Mehak Sachdeva, and Sarah Bardin
Spatial Analysis Research Center (SPARC)
Arizona State University, Tempe, USA
================================================================================
Model type:                                                             Gaussian
Number of observations:                                                      350
Number of covariates:                                                          6
Dependent variable:                                                     TotalEBS
Variable standardization:                                                     On
Total runtime:                                                           0:00:10

Global Regression Results
--------------------------------------------------------------------------------
Residual sum of squares:                                                 151.110
Log-likelihood:                                                         -349.642
AIC:                                                                     711.284
AICc:                                                                    713.611
R2:                                                                        0.568
Adj. R2:                                                                   0.562

Variable                                   Est.         SE  t(Est/SE)    p-value
------------------------------------ ---------- ---------- ---------- ----------
Intercept                                 0.000      0.035      0.000      1.000
V11                                       0.146      0.037      3.980      0.000
V12                                       0.297      0.057      5.224      0.000
V16                                       0.268      0.045      5.991      0.000
V24                                       0.142      0.039      3.655      0.000
V26                                       0.303      0.054      5.622      0.000

Multiscale Geographically Weighted Regression (MGWR) Results
--------------------------------------------------------------------------------
Coordinates type:                                                      Projected
Spatial kernel:                                                Adaptive bisquare
Criterion for optimal bandwidth:                                            AICc
Score of change (SOC) type:                                          Smoothing f
Termination criterion for MGWR:                                          1.0e-05
Number of iterations used:                                                    17

MGWR bandwidths
--------------------------------------------------------------------------------
Variable                  Bandwidth      ENP_j   Adj t-val(95%)            DoD_j
Intercept                    59.000     14.916            2.954            0.539
V11                       348.000      1.211            2.048            0.967
V13                      335.000      1.487            2.133            0.932
V16                   253.000      2.891            2.392            0.819
V24                     196.000      3.463            2.458            0.788
V26                      348.000      1.382            2.103            0.945

Diagnostic Information
--------------------------------------------------------------------------------
Residual sum of squares:                                                 108.666
Effective number of parameters (trace(S)):                                25.352
Degree of freedom (n - trace(S)):                                        324.648
Sigma estimate:                                                            0.579
Log-likelihood:                                                         -291.940
Degree of Dependency (DoD):                                                0.754
AIC:                                                                     636.583
AICc:                                                                    641.051
BIC:                                                                     738.247
R2:                                                                        0.690
Adj. R2:                                                                   0.665

Summary Statistics For MGWR Parameter Estimates
--------------------------------------------------------------------------------
Variable                        Mean        STD        Min     Median        Max
--------------------      ---------- ---------- ---------- ---------- ----------
Intercept                    -0.049      0.280     -0.545     -0.070      0.620
V11                           0.115      0.008      0.103      0.113      0.129
V13                           0.375      0.030      0.311      0.384      0.408
V16                           0.327      0.053      0.236      0.317      0.422
V24                           0.125      0.065      0.013      0.130      0.241
V26                           0.374      0.004      0.365      0.374      0.383
================================================================================
Acknowledgement:
We acknowledge the support of the National Science Foundation under Award 1758786 
from the Geography and Spatial Sciences Program to A. S. Fotheringham which 
enabled this software to be written and made freely available.
================================================================================
